# Supplementary material for: A plasmid DNA-launched SARS-CoV-2 reverse genetics system and coronavirus toolkit for COVID-19 research
Source: PubMed Central journal article supplement (PMC7906417; doi:10.1371/journal.pbio.3001091), 2021-02-25

**ORF6 (~6 kDa)**

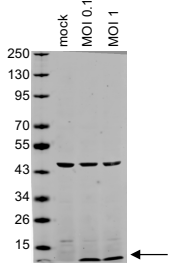

**ORF8 (~12 kDa)**

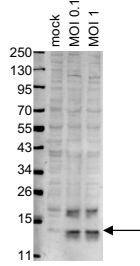

**ORF9a (~10 kDa)**

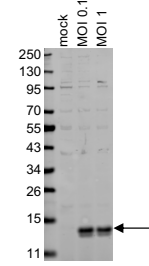

**ORF10 (~4 kDa)**

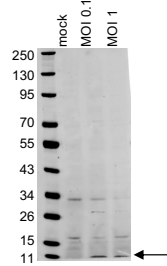

**nsp10 (~14 kDa)**

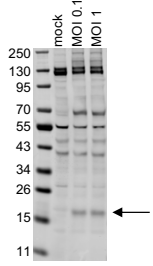

**ORF7b (~4 kDa)**

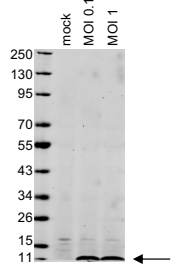

**nsp7 (~8 kDa)**

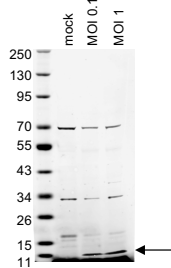

**nsp9 (~11 kDa)**

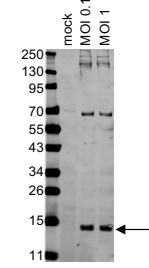

**ORF3b (~15 kDa)**

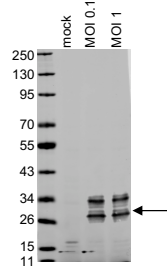

**ORF9b (~7 kDa)**

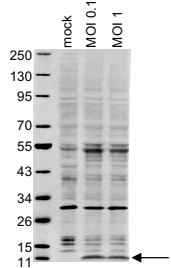

**ORF3a (~28 kDa)**

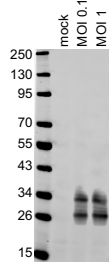

**nsp1 (~18 kDa)**

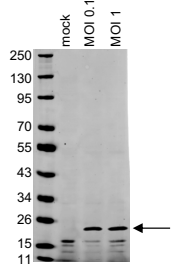

**nsp2 (~64 kDa)**

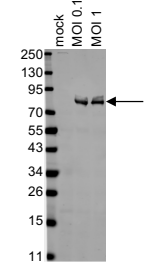

**M (~22 kDa)**

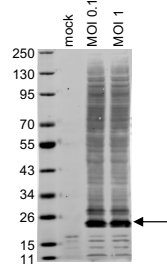

**E (~7.5 kDa)**

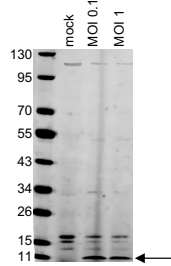

**nsp8 (~20 kDa)**

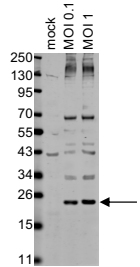

**nsp13 (~60 kDa)**

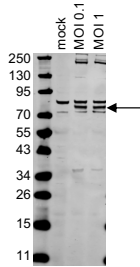

**nsp14 (~53 kDa)**

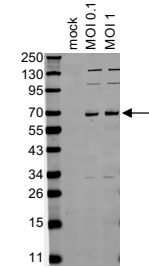

**nsp16 (~30 kDa)**

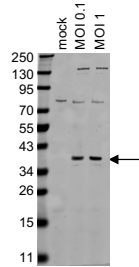

**N (~42 kDa)**

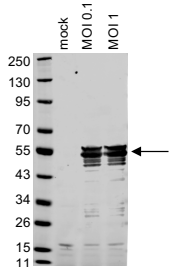

**nsp5 (~30 kDa)**

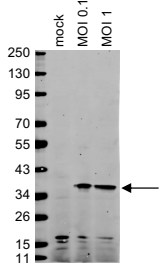

**nsp11/12 (~94 kDa)**

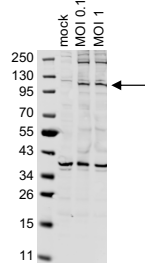

**nsp15 (~35 kDa)**

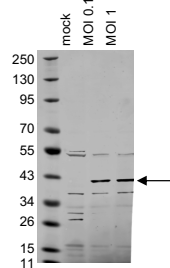

**S (~127 kDa)**

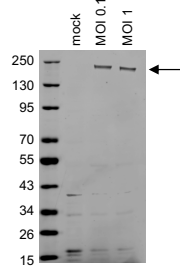

**ORF7a (~12 kDa)**

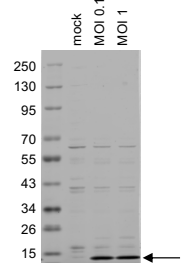

**S-RBD**

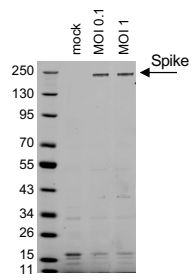

**nsp3 (~195 kDa)**

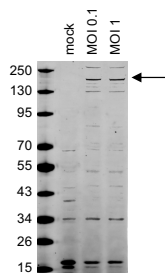

**actin (45 kDa)**

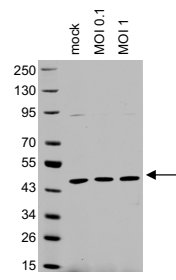

Supplement: pbio.3001091.s003.pdf [file pbio.3001091.s003.pdf]
