# Supplementary material for: A plasmid DNA-launched SARS-CoV-2 reverse genetics system and coronavirus toolkit for COVID-19 research
Source: PubMed Central journal article supplement (PMC7906417; doi:10.1371/journal.pbio.3001091), 2021-02-25

**Figure 2D**  
**ORF3a**

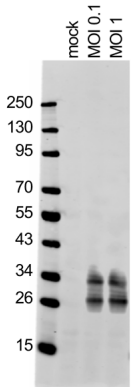

**Figure 2D**  
**N**

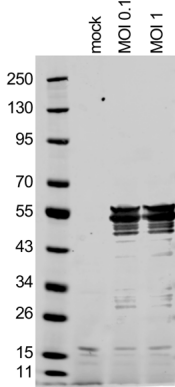

**Figure 2D**  
**nsp2**

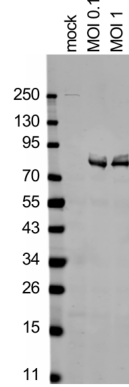

**Figure 2D**  
 **$\beta$ -actin**

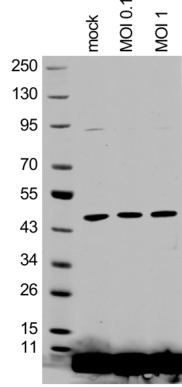

**Figure 2E**  
**ORF3a**

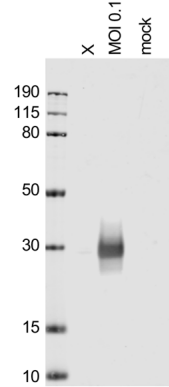

**Figure 2E**  
**N**

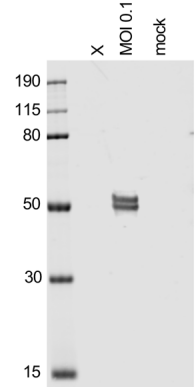

**Figure 2E**  
**nsp2**

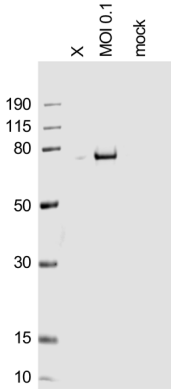

**Figure 2G**  
**ORF3a**

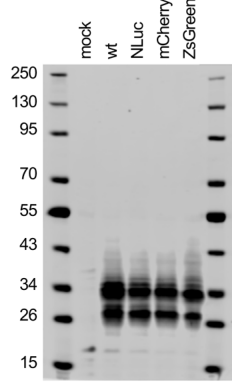

**Figure 2G**  
**N**

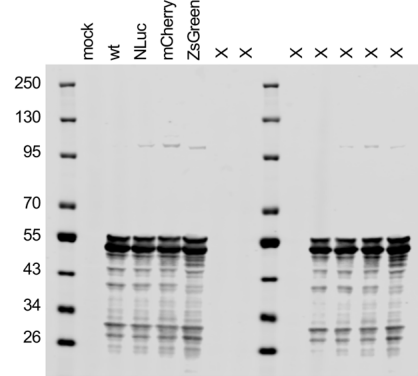

**Figure 2G**  
**nsp2**

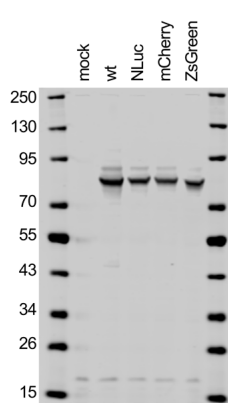

**Figure 2G**  
**actin**

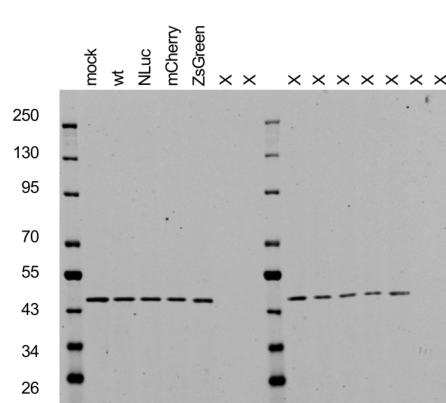

**Figure 3A**

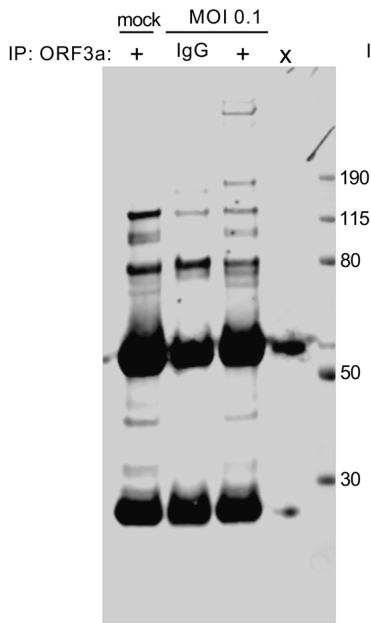

**Figure 3A**

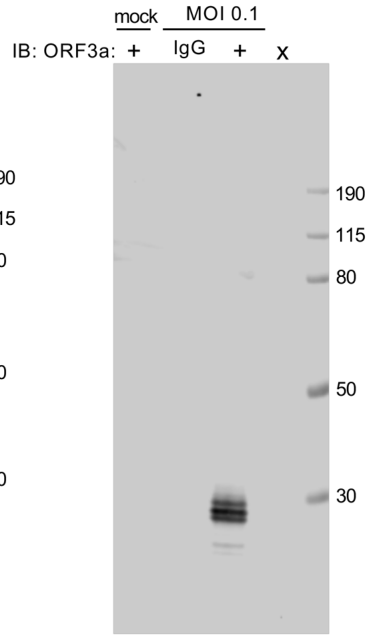

**Figure 3B**

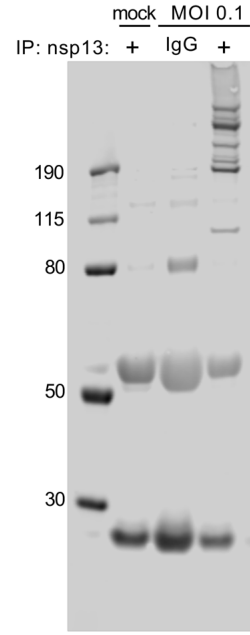

**Figure 3B**

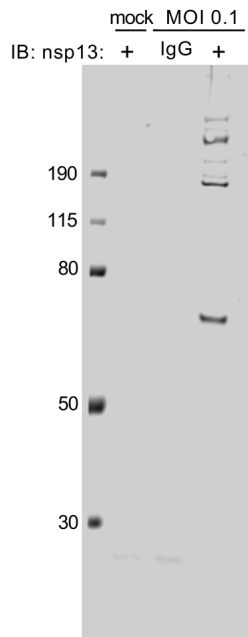

**Figure 3C**

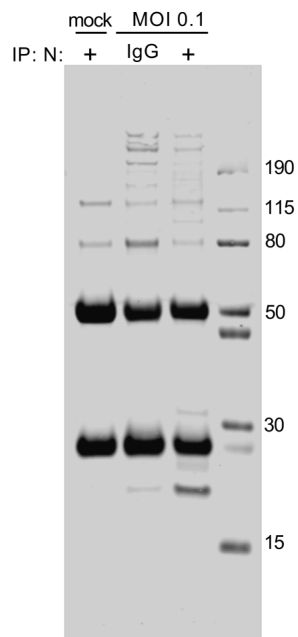

**Figure 3C**

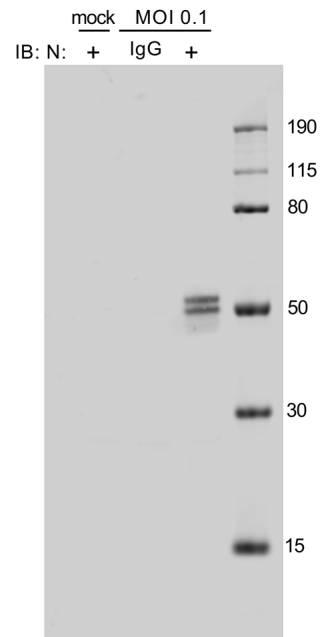

**Figure 4B**

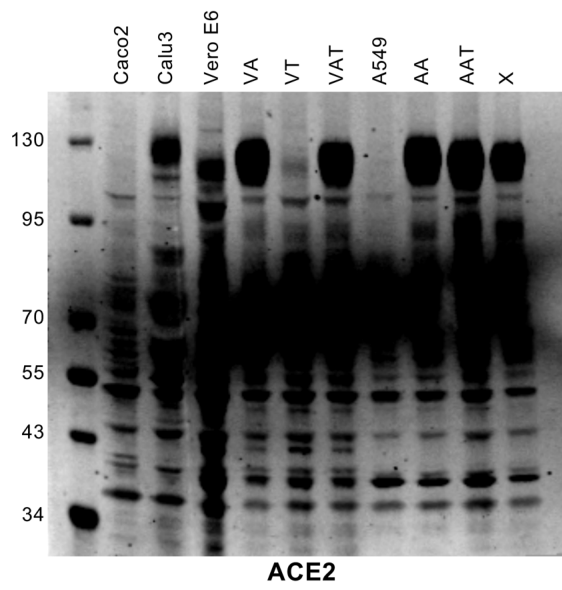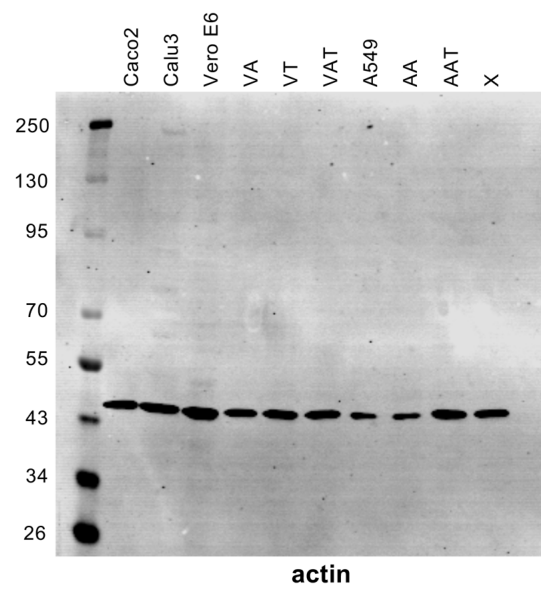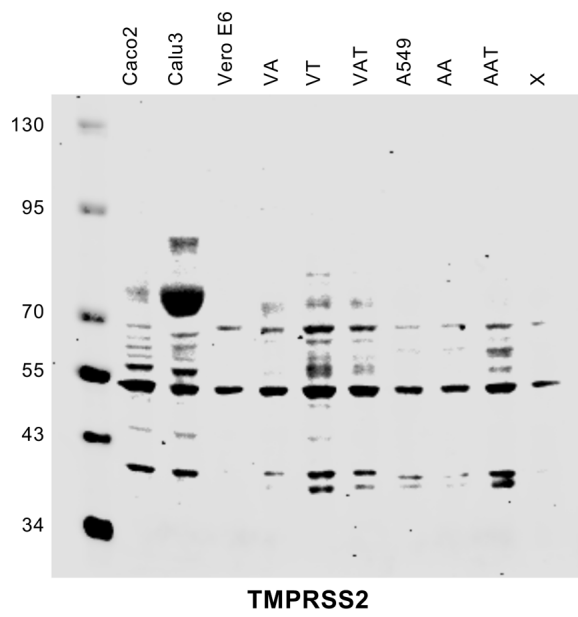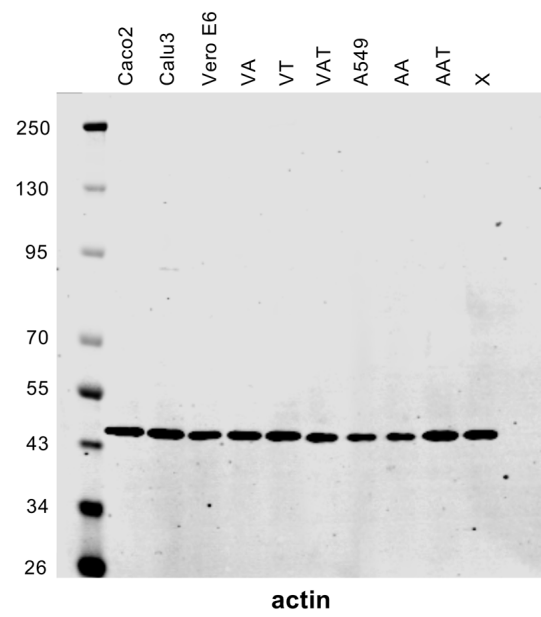

# S3 Fig. 1 of 2

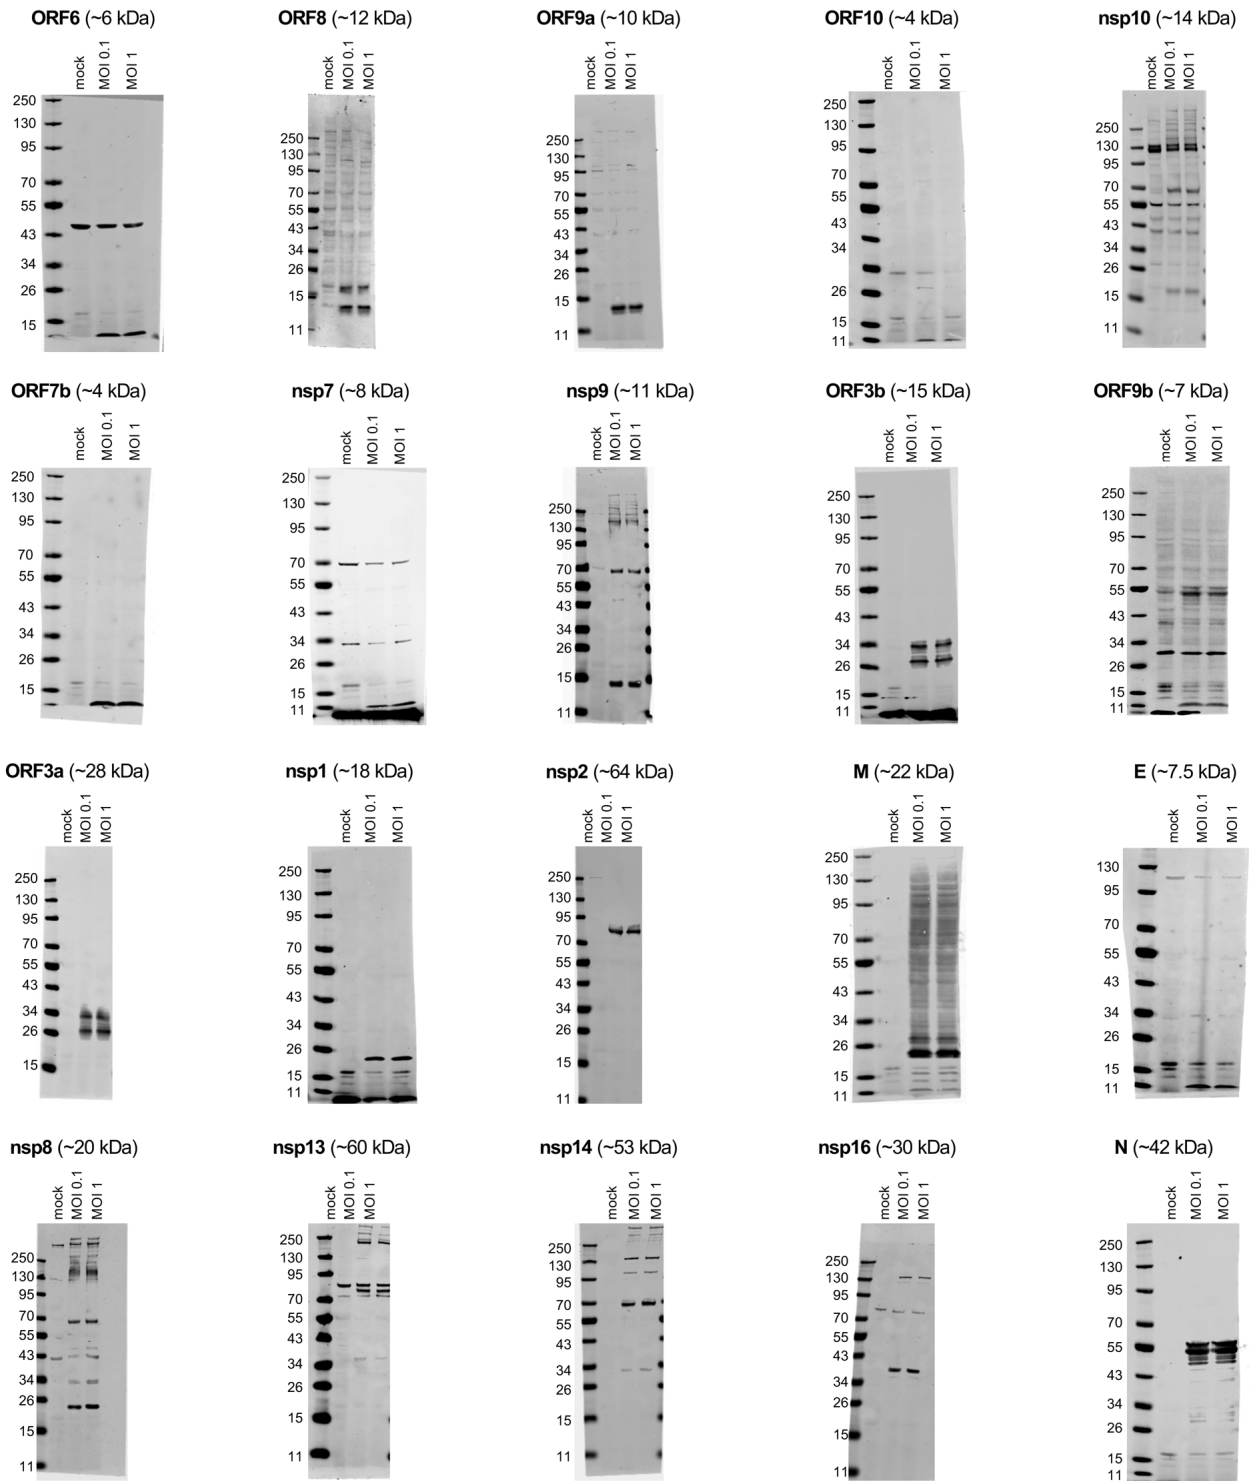

# S3 Fig. 2 of 2

**nsp5 (~30 kDa)**

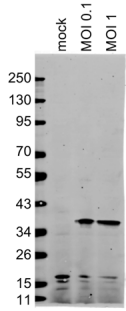

**nsp11/12 (~94 kDa)**

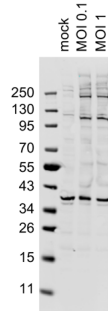

**nsp15 (~35 kDa)**

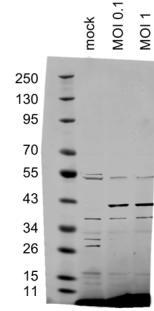

**S (~127 kDa)**

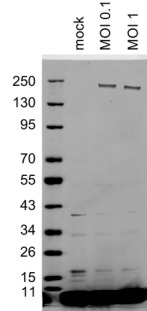

**ORF7a (~12 kDa)**

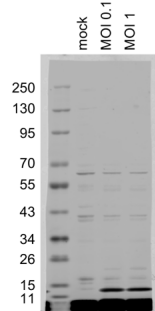

**S-RBD**

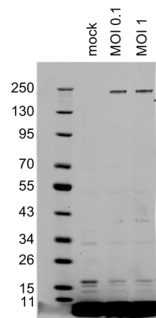

**nsp3 (~195 kDa)**

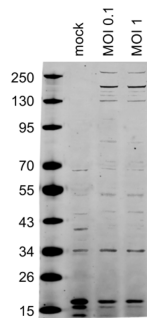

**actin (45 kDa)**

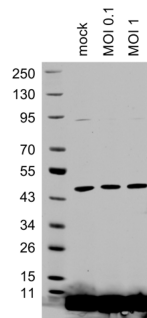

# S4 Fig.

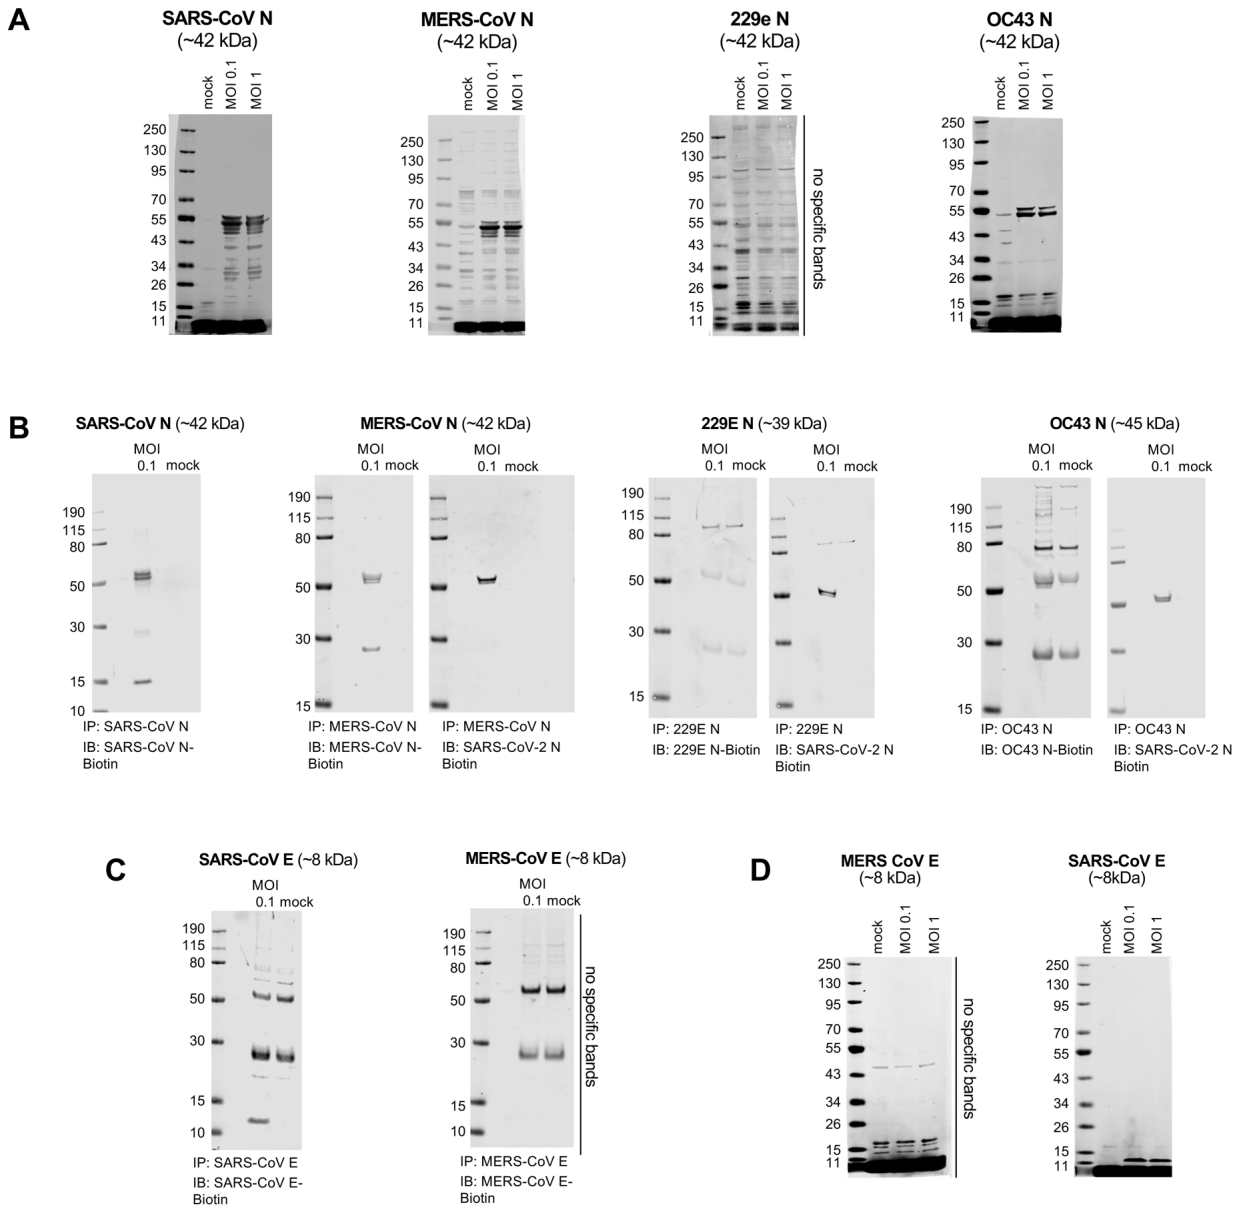

# S5 Fig. 1 of 2

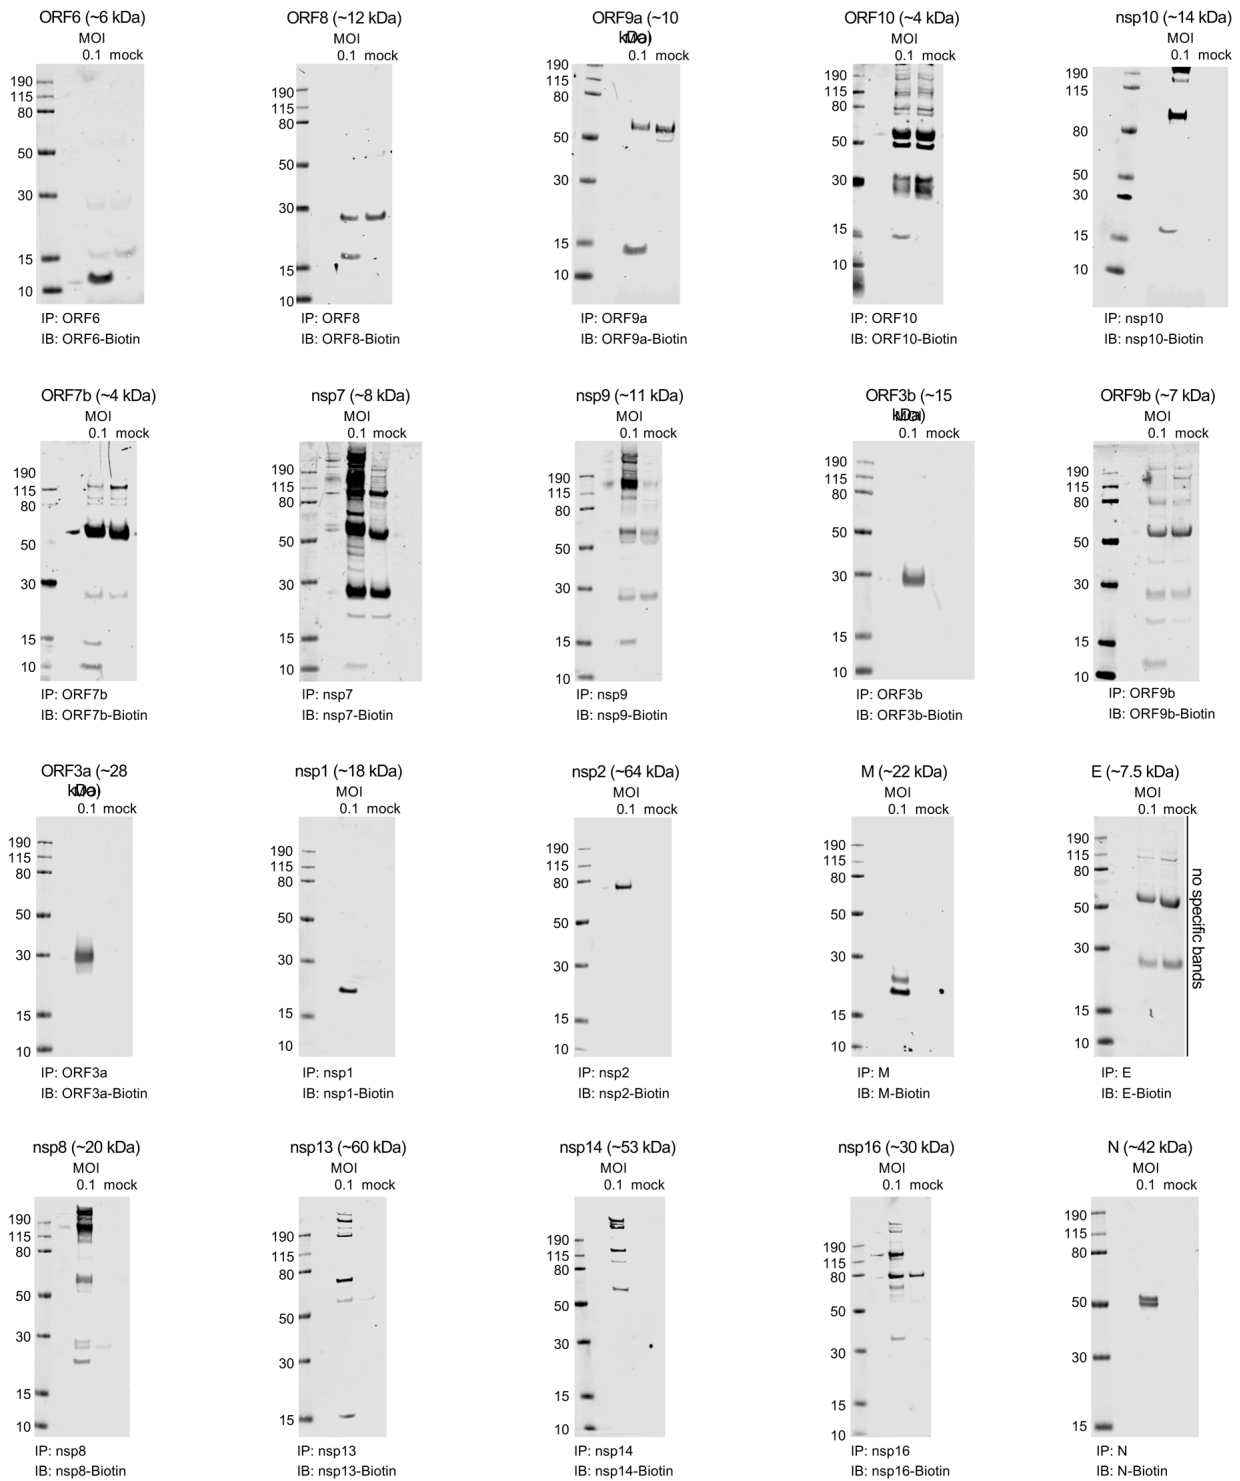

# S5 Fig. 2 of 2

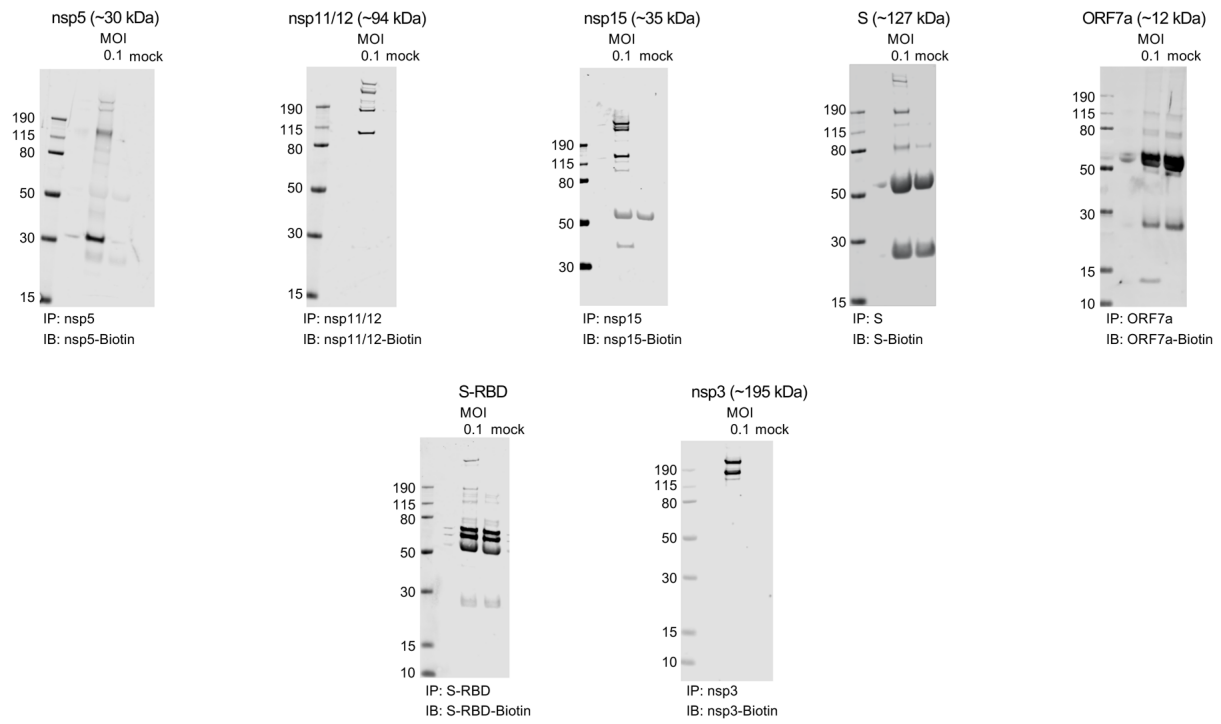

Supplement: pbio.3001091.s011.pdf [file pbio.3001091.s011.pdf]
