# Supplementary material for: A plasmid DNA-launched SARS-CoV-2 reverse genetics system and coronavirus toolkit for COVID-19 research
Source: PubMed Central journal article supplement (PMC7906417; doi:10.1371/journal.pbio.3001091), 2021-02-25

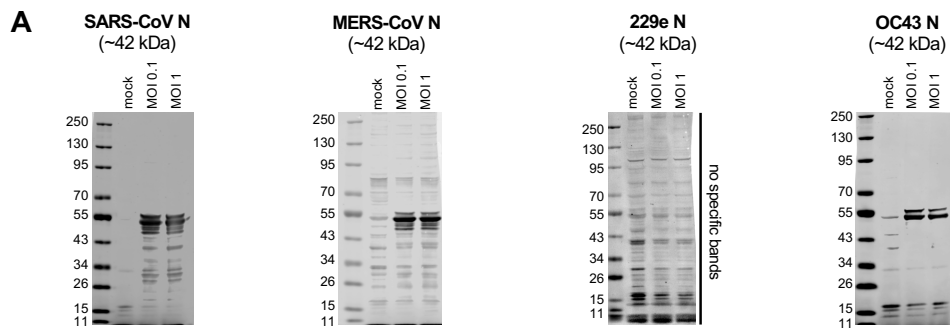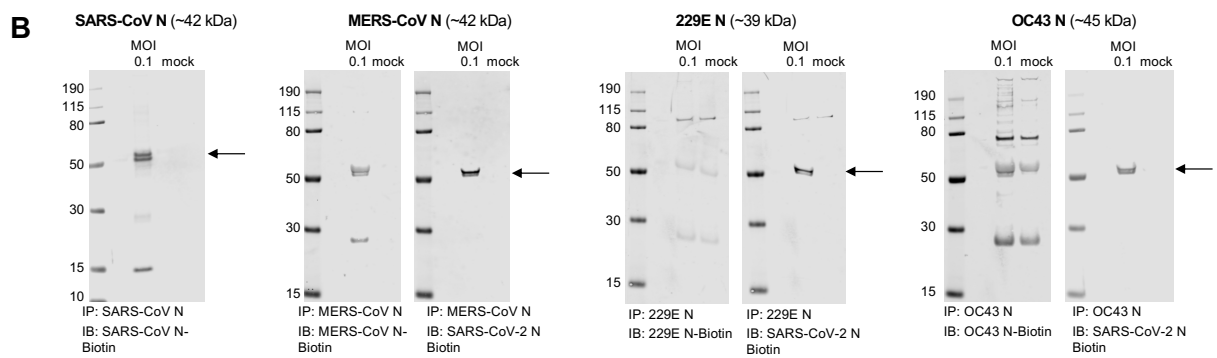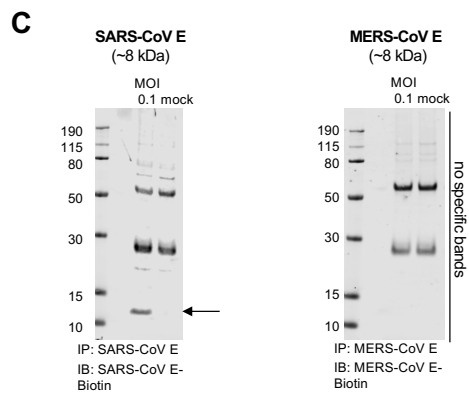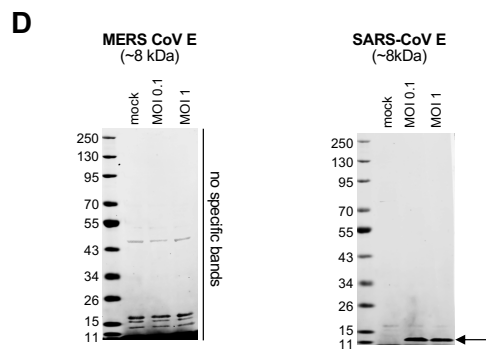

Supplement: pbio.3001091.s004.pdf [file pbio.3001091.s004.pdf]
