# Supplementary material for: A plasmid DNA-launched SARS-CoV-2 reverse genetics system and coronavirus toolkit for COVID-19 research
Source: PubMed Central journal article supplement (PMC7906417; doi:10.1371/journal.pbio.3001091), 2021-02-25
Supplement: pbio.3001091.s007.pdf [file pbio.3001091.s007.pdf]

## 1 **S1 Text. Extended Materials and Methods**

2

3 **Design of reverse genetics (RG) SARS-CoV-2 clone design.** pCC1-4K-SARS-  
4 CoV-2, pCC1-4K-SARS-CoV-2-mCherry and pCC1-4K-SARS-CoV-2-NLuc were  
5 made from synthetic DNA fragments (Genscript). Similarly, pCC1-4K-SARS-CoV-2-  
6 ZsGreen was also made from a synthetic *Bam*HI-*Xho*I fragment (Bio Basic). pCC1-  
7 4K-SARS-CoV-2 was assembled from five synthetic DNAs (**Figure 1**) using restriction  
8 endonuclease based cloning procedures. In order to increase the cloning efficiency  
9 and to monitor for possible assembly errors the assembly was performed using  
10 stepwise protocol (FR1+FR5 →FR15+FR4 → FR145+FR2 →FR1245+FR3 → full-  
11 length clone). The assembly of pCC1-4K-SARS-CoV-2-mCherry and pCC1-4K-  
12 SARS-CoV-2-NLuc was performed the same way except the marker-gene containing  
13 fragment was added to FR1 prior to adding other fragments. The exception was pCC1-  
14 4K-SARS-CoV-2-mCherry where the *Bam*HI-*Xho*I fragment was inserted in the  
15 *Bam*HI-*Xho*I digested wt pCC1-4K-SARS-CoV-2 backbone. The pCC1-4K based  
16 plasmids were propagated in TransforMax™ EPI300™ Electrocompetent *E. coli* which  
17 were transformed using electroporation (BioRad Gene Pulser Xcel) and grown in  
18 Tryptic Soy Broth/Agar (Becton Dickinson) supplemented chloramphenicol at 12.5  
19 µg/ml. Purification of plasmids used for transfection was performed as follows: 200 ml  
20 overnight bacterial culture was diluted 1:5 with growth media and induced by adding  
21 D-arabinose at final concentration 0.1%. Culture was incubated at 37°C for 5 hrs  
22 before bacteria were lysed; endotoxin free DNA was purified using Nucleobond Xtra  
23 Midi EF kit (Machery Nagel, 740420.50).

24

25 **Lentiviral vector design.** The pLV-EF1a-IRES-Hygro (Addgene plasmid #85134)  
26 and pLV-EF1a-IRES-Neo (Addgene plasmid #85139) lentiviral vectors were modified  
27 to include *SfiI* sites flanking the transgene by sub-cloning the TagRFP ORF with  
28 flanking *SfiI* sites between the unique *BamHI* and *EcoRI* restriction sites using PCR  
29 (primer pair AW177-*BamHI*-*SfiI*-RFP-F' and AW178-*EcoRI*-*SfiI*-RFP-R', described in  
30 S2 Table). To make pLV-EF1a-IRES-Hygro-ACE2 (also referred to as pLV-ACE2 or  
31 pLV-Hygro-ACE2), a DNA sequence of the *Homo sapiens* angiotensin I converting  
32 enzyme II (ACE2) ORF (GenBank NM\_001371415.1) was chemically synthesised in  
33 pEX-A258 (Eurofins) with corresponding flanking *SfiI* sites. The *SfiI* fragment was then  
34 sub-cloned into the modified pLV-EF1a-IRES-Hygro plasmid. For *Homo sapiens*  
35 transmembrane serine protease 2 (TMPRSS2) the DNA sequence of the ORF  
36 (GenBank NM\_005656) was synthesised as a gBlock (Integrated DNA Technologies)  
37 with flanking *SfiI* sites. The product was amplified by PCR (primers MT\_313  
38 HsTMPRSS2 5' *SfiI* and MT\_314 HsTMPRSS2 3' *SfiI* described in S2 Table) and the  
39 *SfiI* fragment was subcloned into modified pLV-EF1a-IRES-Neo. The ACE2 and  
40 TMPRSS2 ORFs in pLV-EF1a-IRES-Hygro-ACE2 (also referred to as pLV-ACE2 or  
41 pLV-Hygro-ACE2) and pLV-EF1a-IRES-Neo-TMPRSS2 (also referred to as pLV-  
42 TMPRSS2 or pLV-Neo-TMPRSS2), respectively, were sequence verified by Sanger  
43 sequencing (Eurofins). The GagPol expression plasmid pNLGP and the VSV  
44 glycoprotein expression plasmid pVSV-G have been described previously (Rihn *et al.*,  
45 2019). The HIV-1 LNEIE capsid in the pNLGP-CapNM background (Soll *et al.*, 2013)  
46 was a kind gift of Prof. Paul Bieniasz.

47

48 **Cells and generation of cell lines expressing exogenous ACE2 and TMPRSS2.**

49 A549 (ATCC #CCL-185; generous gift from Prof. Ben Hale) and Vero E6 cells  
50 (generous gift of Prof. Michele Bouloy) were maintained in Dulbecco's modified  
51 Eagle's medium (DMEM) supplemented with 9% fetal calf serum (FCS) and 10  $\mu\text{g/ml}$   
52 gentamicin. BHK-21 cells (ATCC #CCL-10, purchased from ATCC, Bethesda, MD)  
53 were maintained in DMEM supplemented with 5% fetal calf serum (FCS; Life  
54 Technologies).

55 Lentiviral vectors pseudotyped with the VSV glycoprotein were produced by  
56 transient transfection of HEK 293T cells with 5  $\mu\text{g}$  of lentivirus vector plasmid, 5  $\mu\text{g}$  of  
57 GagPol expression plasmid, and 1  $\mu\text{g}$  of VSV-G expression plasmid. The supernatant  
58 containing the lentiviral vector was passed through a 0.2  $\mu\text{m}$  pore size filter and used  
59 to transduce relevant cells. A549 and Vero E6 cells were transduced with LV-Hygro-  
60 ACE2 and/or LV-Neo-TMPRSS2 lentiviral vectors (LNEIE capsid was used for  
61 transduction of Vero E6 with the LV-Neo-TMPRSS2 lentiviral vector) and selected with  
62 either hygromycin B (200  $\mu\text{g/ml}$ ) or G418 (2 mg/ml) respectively. For dual ACE2- and  
63 TMPRSS2-overexpressing cells, hygromycin B-selected -ACE2 overexpressing bulk  
64 populations were subsequently transduced with LV-Neo-TMPRSS2 and selected with  
65 G418.

66

67 **Isolation of SARS-CoV-2 viruses from clinical samples.** Sputum and  
68 bronchoalveolar lavage (BAL) residual clinical samples from SARS-CoV-2-infected  
69 individuals were obtained for culture following informed consent (written) as part of the  
70 ISARIC4C study and sequencing was carried out at the CVR within the context of the  
71 COG-UK consortium (patient sample IDs: CVR837 sputum (GISAID accession:

72 EPI\_ISL\_461705) for CVR-GLA-1, CVR2224 sputum (GISAID accession:  
73 EPI\_ISL\_448167) for CVR-GLA-2, CVR3899\_BAL (GISAID accession:  
74 EPI\_ISL\_490695) for CVR-GLA-3). Ethical approvals were granted for COG-UK  
75 (16/WS/0207NHS and 10/ S1402/33) and for ISARIC4C England and Wales  
76 (13/SC/0149), and Scotland (20/SS/0028). Specifically, Vero E6 or Vero E6-ACE2-  
77 TMPRSS2 cells were seeded at  $3.5 \times 10^5$  cells per T25 flask one day prior to  
78 inoculation. Upon arrival, clinical samples were resuspended in 1-2 ml of serum-free  
79 DMEM supplemented with 10  $\mu\text{g/ml}$  gentamicin, 100 units/ml penicillin-streptomycin  
80 and 2.5  $\mu\text{g/ml}$  amphotericinB. Up to 500  $\mu\text{l}$  of the resuspended clinical sample was  
81 subsequently used for inoculation of the T25 flask in a volume of 5 ml DMEM  
82 supplemented with 2% FCS, 10  $\mu\text{g/ml}$  gentamicin, 100 units/ml penicillin-streptomycin  
83 and 2.5  $\mu\text{g/ml}$  amphotericinB. At 18 hrs post-inoculation, the medium was changed to  
84 remove residual sample debris. Daily observation of the cell monolayer for CPE was  
85 carried out. Samples were harvested between 48-96 hrs post-infection, depending on  
86 the severity of CPE. Supernatants were centrifuge clarified at 500 x g for 10 minutes  
87 at 4°C, aliquoted and stored at -80°C. Viral titers were determined by plaque assay.  
88 Subsequent passaging of clinical isolates was done on Vero E6 cells.

89

90 **Sequencing of clinical isolates and rescued viruses.** Extracted nucleic acid was  
91 incubated with DNaseI (Thermo Fisher, Part Number AM2222) for 5 minutes at 37°C.  
92 After DNase treatment, the samples were purified using Agencourt RNA Clean  
93 AMPure XP Beads (Beckman Coulter, cat# A63987), following the manufacturer's  
94 guidelines, and quantified using the Qubit dsDNA HS Kit (Thermo Scientific, cat#  
95 Q32854). cDNA was synthesised using SuperScript III (Thermo Scientific, cat#

96 18080044) and NEBNext Ultra II Non-Directional RNA Second Strand Synthesis  
97 Module (New England Biolabs, cat# E6111L), as per the manufacturer's guidelines.  
98 CVR-GLA-1 was processed using the Illumina Nextera DNA Flex Kit (Illumina, cat#  
99 20018704), following the manufacture's guideline and IDT for Illumina Nextera DNA  
100 Unique Dual Indexes (Illumina cat# 20027213). All the remaining samples were  
101 processed utilising the Kapa LTP Library Preparation Kit for Illumina Platforms (Kapa  
102 Biosystems, cat# KK8232). Briefly, the cDNA was end repaired and the protocol  
103 followed through to adapter ligation. At this stage the samples were uniquely indexed  
104 using the NEBNext Multiplex Oligos for Illumina 96 Unique Dual Index Primer Pairs  
105 (New England Biolabs, cat# E6442S), with 15 cycles of PCR performed.

106 All amplified libraries were quantified by Qubit dsDNA HS Kit and run on the  
107 Agilent 4200 TapeStation System (Agilent, cat# G2991AA) using the High Sensitivity  
108 D5000 Screentape (Agilent, cat# 5067-5592) and High Sensitivity D5000 Reagents  
109 (Agilent, cat# 5067-5593).

110 Libraries were sequenced on Illumina's NextSeq 550 System (Illumina, cat#  
111 SY-415-1002) generating 2-12 million paired-end reads per sample for clinical isolates  
112 and approximately 30 million reads for rescued viruses.

113 CVR-GLA-3 was re-sequenced using amplicon sequencing, to confirm  
114 consensus. Briefly, the sequencing library was prepared according to the ARTIC  
115 nCoV-2019 sequencing protocol version 2 <https://artic.network/ncov-2019> until the  
116 amplicon generation step. Generated amplicons were used to prepare Illumina  
117 sequencing libraries using Kapa LTP Library as described above. Sequencing of  
118 libraries was carried out on Illumina's MiSeq system (Illumina, cat# SY-410-1003)

119 using a MiSeq Reagent v2 500 cycle nano kit (Illumina, cat# MS-103-1003).  
120 Sequencing generated approximately 0.3 million paired end reads per sample.

121

122 **Passaging the wt reverse genetics (RG) plasmid.** The wt pCC1-4K-SARS-CoV-2  
123 plasmid was transformed by electroporation (BioRad Gene Pulser Xcel) using  
124 TransforMax™ EPI300™ Electrocompetent *E. coli*. This was considered P0. Two  
125 colonies were picked (to create 2 plasmid lineages) and grown for 6 hours in identical  
126 2 ml cultures of Tryptic Soy Broth (Becton Dickinson) supplemented with  
127 chloramphenicol at 12.5 µg/ml. The cultures were diluted 1:100 and plated on fresh  
128 plates (considered P1). This process was repeated until the P5 plate (5x 6 hr liquid  
129 cultures and 6x solid cultures). Plasmid DNA from one colony from each P5 plate was  
130 generated as follows. A 10 hr 2 ml culture was diluted to a 12 hr 200 ml culture, which  
131 was diluted 1:5 with growth media and induced by adding D-arabinose to a final  
132 concentration 0.1%. This culture was incubated at 37°C for 5 hrs before bacteria were  
133 lysed and endotoxin free DNA was extracted using Nucleobond Xtra Midi EF kit  
134 (Machery Nagel, 740420.50). The conservative estimate of >100 doublings is based  
135 upon 1 doubling per hour in 5x 6 hr liquid cultures (30) and 6x12 hr solid phase cultures  
136 (72) and does not take into account the doublings required to make the 1L culture for  
137 plasmid extraction.

138

139 **SARS-CoV-2 virus passage.** Cells were seeded the day before infection in T25 flasks  
140 (7x10<sup>5</sup> cells per flask for GLA1 passage series) or in 6-well plates (4x10<sup>5</sup> cells per well  
141 for mCherry passage series) in DMEM supplemented with 10% FCS before being  
142 infected using 0.01 pfu/cell (GLA-1) or 0.1 (mCherry) pfu/cell. The passage series

143 indicated in the figures was followed. Immediately before each passage, medium was  
144 removed from the fresh target cells and replaced with DMEM supplemented with  
145 reduced FCS (2-4%). At each passage, virus-containing supernatant was harvested  
146 and clarified by low-speed spin. The fresh cells were inoculated with virus-containing  
147 supernatant diluted ~1:100 (Vero E6) or 1:200 (AAT, the increased dilution factor  
148 taking into account the increased susceptibility of these cells to SARS-CoV-2  
149 infection). At the indicated points, 250  $\mu$ l of virus-containing supernatant was mixed  
150 with TRIzol LS (Thermo Fisher) and RNA was extracted using a hybrid Trizol-RNeasy  
151 protocol.

152

153 **SARS-CoV-2 fluorescent plaque assays.** Plaque assays of passages 3-5 were  
154 conducted as described in Plaque Assay section above. Fixed cells were scanned on  
155 the Celigo Imaging Cytometer (Nexcelom Bioscience) using the red channel to  
156 visualize mCherry or green channel to visualize ZsGreen. The cells were then  
157 subsequently stained with Coomassie staining solution (2 % Coomassie Brilliant Blue  
158 R-250, 50 % ethanol, 7.5% acetic acid) for 30 min then rinsed with water. The  
159 Coomassie stained cells were imaged on the brightfield channel of the Celigo Imaging  
160 Cytometer. Because the 6-well format is relatively large, the presented images are  
161 composites of multiple Celigo images taken of the same wells. The stability of the  
162 mCherry reporter virus was assessed by scoring the percentage of plaques visible  
163 following Coomassie staining that were mCherry-positive in the linear range of the  
164 dilution series (total plaque number in the range of 22-55 for each replicate).

165

166 **Quantification of mCherry and N-expressing cells.** To quantify the proportion of  
167 cells positive for mCherry and for N protein, Vero E6 cells seeded in 24-well plates  
168 were infected with passage 3 SARS-CoV-2-mCherry at an MOI of 0.1 for 48 h. Fixed  
169 and permeabilised cells were then stained for N protein using the primary sheep anti-  
170 N (DA114, 5th bleed) antibody at 1:500, followed by a secondary mouse anti-sheep  
171 IgG-FITC labelled antibody (Sigma, F4891) used at 1:100, and with Hoechst 33342 (2  
172  $\mu\text{g/ml}$ ) as described above. Cells were imaged using the Celigo Imaging Cytometer  
173 and Hoechst-positive cells were gated into populations based on mean fluorescent  
174 intensity of the green and red channels to identify the proportion of infected cells  
175 positive for mCherry and/or N protein. Virus infections were performed in triplicate and  
176 at least 45000 cells were quantified for each sample.

177

178 **Sequencing of reverse genetics (RG) plasmids.** Purified plasmid DNA was sheared  
179 to  $\sim 300\text{bp}$  using a Covaris S220 Focused-ultrasonicator (Covaris, cat# 500217).  
180 Approximately 40ng of sheared DNA was used to prepare sequencing libraries using  
181 Kapa HyperPrep kit (Kapa Biosystems, cat# KK8504). The samples were uniquely  
182 indexed using the NEBNext Multiplex Oligos for Illumina 96 Unique Dual Index Primer  
183 Pairs Set 2 (New England Biolabs, cat# E6442S) and 5 cycles of PCR were performed.  
184 The amplified libraries were quantified by Qubit dsDNA HS Kit and run on the Agilent  
185 4200 TapeStation System (Agilent, cat# G2991AA) using the High Sensitivity D5000  
186 Screentape (Agilent, cat# 5067-5592) and High Sensitivity D5000 Reagents (Agilent,  
187 cat# 5067-5593). The sequencing of the libraries was carried out on Illumina's MiSeq  
188 system (Illumina, cat# SY-410-1003) using a MiSeq Reagent v2 500 cycle nano kit



189 (Illumina, cat# MS-103-1003). Sequencing generated approximately 0.3 million  
190 paired-end reads per sample.

191

192 **Bioinformatic analyses.** For CVR-GLA-1 and CVR-GLA-3, reads were quality-  
193 trimmed using TrimGalore, aligned to the SARS-CoV-2 Wuhan-Hu-1 reference  
194 sequence (accession MN908947) using BWA (Li and Durbin, 2009), and the  
195 consensus was called on all sites with a depth greater than 10 reads using iVar  
196 (Grubaugh *et al.*, 2019); for the CVR-GLA-3 (CVR3899) sample re-sequenced using  
197 amplicons, iVar was also used to trim ARTIC primers from the aligned reads.  
198 Mutations with frequencies above 10% were extracted from the read alignment using  
199 DiversiTools (<http://josephhughes.github.io/DiversiTools/>). Rescued viruses were first  
200 *de novo* assembled using SPAdes (Bankevich *et al.*, 2012) to identify the sequence  
201 and location of the reporter gene (mCherry, ZsGreen or NLuc), based on the Wuhan-  
202 Hu-1 reference sequence, leading to the manual creation of a new reference sequence  
203 for each rescued virus. Samples were subsequently aligned to their corresponding  
204 reference sequence and checked for any consensus level mutations or indels using  
205 BWA and iVar as described previously; no consensus level mutations or indels were  
206 observed. For plasmids, a reference sequence for the mCherry reporter containing  
207 plasmid was already available (pCC1-4K-SARS-CoV-2-mCherry), this was manually  
208 modified to create a corresponding sequence for the wild type, ZsGreen and NLuc  
209 reporter-containing plasmid, using the obtained *de novo* sequences from the rescued  
210 viruses. Samples were subsequently aligned to their corresponding reference  
211 sequence and checked for any consensus level mutations or indels using BWA and  
212 iVar as described previously; no consensus level mutations or indels were observed.

213 For CVR-GLA-2, mapping of the SARS-CoV-2-specific reads was performed  
214 using the in-house, reference-based assembly tool  
215 Tanoti (<http://www.bioinformatics.cvr.ac.uk/tanoti.php>), with Wuhan-Hu-1  
216 (NC\_045512.2) as the reference sequence. A consensus sequence was produced  
217 from the resulting SAM file. Analysis of the sequence was performed using the online  
218 bioinformatic tool CoV-GLUE (<http://cov-glue.cvr.gla.ac.uk/>). To investigate the low  
219 frequency diversity present in plasmid and rescued virus samples, mutation  
220 frequencies were calculated at all genome positions that had a minimum coverage of  
221 100 and using a minimum quality score of 30 using DiversiTools; a conservative  
222 arbitrary frequency threshold of 1% was selected to distinguish substitutions from  
223 sequencing errors and artefacts. Sequence reads for the pCC1-4K plasmids and  
224 rescued viruses, and clinical isolates, can be accessed in the  
225 GenBank BioProject PRJNA658321.

226

227 **Metagenomics results.** To determine whether contamination was present in the  
228 clinical isolates, the quality-filtered reads for CVR-GLA-1 and CVR-GLA-3 were  
229 compared to the NCBI RefSeq database (O’Leary *et al.*, 2016) using DIAMOND blastx  
230 (Buchfink, Xie and Huson, 2015). For the CVR-GLA-3 clinical isolate 1,909,732 reads  
231 were produced and 28% of all DIAMOND blastx hits were to viruses, and all but one  
232 of these was to the SARS-CoV-2 containing Sarbecovirus genus; a single read gave  
233 a distant hit to Brochothrix phage A9. The remaining reads were predominantly  
234 classified as Eukaryotic (56%; 39% to the subphylum Vertebrata), with 11% of reads  
235 hitting to bacteria (predominantly *Acinetobacter baumannii*, *Staphylococcus agnetis*  
236 and *Clostridioides difficile*). 12,005,902 reads were obtained in CVR-GLA-1 grown in

237 Vero E6 cells, 85% of the 9,007,664 reads with matches to refseq matched SARS-  
238 CoV-2 with most other reads matching *Homo sapiens* followed by *Plasmodium ovale*  
239 *wallikeri*. A small number of reads matched fungi and bacteria indicating a clean cell  
240 and virus culture.

241

242 **Plaque assays.** Monolayers of A549, Vero E6 cells, and their ACE2/TMPRSS2  
243 derivatives were prepared by seeding  $2.5 \times 10^5$  cells/well in 12-well plates and  
244 incubating the cells overnight at 37°C and 5% CO<sub>2</sub>. Serial dilutions of virus were  
245 prepared in DMEM/2% FCS/1 x NEAA, and 150  $\mu$ l was used to infect cell monolayers  
246 following the aspiration of media. The infection was incubated for 1 h at 37°C and 5%  
247 CO<sub>2</sub> with occasional tilting to distribute the inoculum evenly. A 1 ml overlay of  
248 MEM/0.6% Avicel RC-591/2 % FCS was added to each well and cells were incubated  
249 undisturbed for 72 hrs at 37°C and 5% CO<sub>2</sub>. The cells were fixed by submerging in  
250 PBS/8% formaldehyde for a minimum of 1 hr. Cells were washed twice with PBS  
251 before staining with Coomassie Blue staining solution (0.1 % Coomassie Brilliant Blue  
252 R-250/45% methanol/10% acetic acid) for 30 minutes to visualize plaques, and were  
253 finally washed with water. Images of plaque assays were acquired using a photo  
254 scanner (Epson Expression 1680 Pro). Image brightness was adjusted in ImageJ and  
255 photomicrographs were cropped and posterized in Microsoft PowerPoint.

256 To quantify plaque area, the brightness and contrast of scan images were  
257 adjusted, the image desaturated and then posterized to 2 levels in GIMP-2.10. Plaque  
258 area was quantified in ImageJ-1.53a (Schneider, Rasband and Eliceiri, 2012) by using  
259 the wand tracing tool to trace around the edge of isolated plaques and using the  
260 measure command. To calculate plaque area in mm<sup>2</sup>, the wand tracing tool was used

261 to quantify the mean pixel area of three independent uninfected monolayers which  
262 were assumed to have an area of 383.6 mm<sup>2</sup>, in accordance with dimensions provided  
263 by the plate supplier (Corning 12-well plates, cat# 3513).

264

265 **Well-clearance/monolayer integrity CPE assay.** Vero E6-ACE2 (VA), Vero E6-  
266 ACE2-TMPRSS2 (VAT), A549-ACE2 (AA) and A549-ACE2-TMPRSS2 (AAT) cells  
267 were seeded in optical 96-well plates (Perkin Elmer CellCarrier-96 Ultra Microplates  
268 Cat# 6055302) at 0.14x10<sup>5</sup> cells/well and incubated overnight. The following day, the  
269 cells were incubated with a panel of 2-fold serially diluted compounds from  
270 MedChemExpress (10-point curves in columns 1-10) where the concentrations ranged  
271 from 10 μM to 20 nM. The compounds were dissolved in DMSO and columns 11 and  
272 12 were incubated with the equivalent dose of DMSO to the highest dose of DMSO  
273 used in the 10 μM incubations. The cells were then mock-infected or infected with a  
274 predetermined dose of SARS-CoV-2 that would cause substantial CPE by 72 hrs post-  
275 infection. At 72 hrs post-infection, cells were fixed with 8% formaldehyde and stained  
276 with Coomassie staining solution (0.1% Coomassie Brilliant Blue R-250/45%  
277 methanol/10% acetic acid). The air-dried plates were scanned using a Celigo imaging  
278 cytometer (Nexcelom), allowing monolayer integrity to be quantified. Quantification of  
279 monolayer integrity in the presence of virus was used to assess virus replication and  
280 was used to assess compound toxicity in the absence of virus. Assays were  
281 ‘multiplexed’ by executing dead cell protease assays in the same plates (supernatant  
282 transferred to a separate assay plate) using the CytoTox-Glo™ Cytotoxicity Assay  
283 (Promega) in accordance with the manufacturer’s instructions and the resulting  
284 bioluminescence was measured using a GloMax Luminometer (Promega). For the

285 dose response curves, virus replication was calculated by comparing the well-  
286 clearance to infected DMSO controls (100% replication) and uninfected DMSO  
287 controls (0% replication) on the same plate. Similarly, toxicity was normalised to  
288 infected DMSO controls (100% toxicity) and uninfected DMSO controls (0% toxicity).  
289 The curves represent the mean and standard error from 4 replicate experiments  
290 (duplicate plates in two independent experiments).  $EC_{50}$  values were interpolated  
291 using GraphPad Prism. Normalised toxicity values above 100% or below 0% were  
292 assigned 100% or 0% values respectively.

293

294 **Generation of anti-coronavirus polyclonal antibodies.** For the sheep polyclonal  
295 antibodies generated for this study, individual SARS-CoV-2, SARS-CoV, MERS-CoV,  
296 HCoV 229E or HCoV OC43 ORFs were cloned into pGex (carrying a GST tag) and  
297 pMex (MBP tag), in order to yield GST- and MBP-tagged coronavirus proteins. The N-  
298 terminal GST fusion proteins for each coronavirus protein were used as antigens, and  
299 sheep were immunised with each antigen, followed by up to 5 further injections 28  
300 days apart, with bleeds performed 7 days after each injection. Antibodies were  
301 subsequently affinity purified from serum using N-terminal MBP-  
302 tagged recombinant protein. The SARS-CoV-2 S, S-RBD and ORF7a antibodies were  
303 generated slightly differently, as for these N-terminal MBP tagged proteins were used  
304 as antigens, and upon harvest, serum antibodies were affinity-purified using the MBP-  
305 tagged protein, followed by depletion of anti-MBP antibodies (to remove the antibodies  
306 present in the serum against MBP). Total IgGs from the serum containing antibodies  
307 to the full-length S of SARS-CoV-2 were purified using a protein G sepharose, as not  
308 enough protein was available to generate an affinity column. Further details (including

309 relevant accession numbers) of the specific protein sequences used as antigens for  
310 each protein can be found in S2 Table and at the website: <https://mrcppu-covid.bio/>.

311

312 **Immunofluorescence for antibody validation.** For the IF used in the validation of  
313 the coronavirus antibodies generated for this study,  $2.5 \times 10^4$  Vero E6 cells were  
314 seeded on glass coverslips in 24 well plates and either uninfected (mock) or infected  
315 with SARS-CoV-2 England-02 (EPI\_ISL\_407073) at a MOI of 0.1. At 48 hrs post  
316 infection, cells were fixed and permeabilised in 8% formaldehyde/1% Triton X-100.  
317 DAPI (Thermo Fisher Scientific, cat# P36395) was included in the mounting medium,  
318 and slides were subsequently incubated with the primary sheep anti-coronavirus  
319 antibodies at 1:500 dilution, followed by incubation with a rabbit anti-sheep Alexa Fluor  
320 555 secondary antibody (Abcam cat# ab150182) at a 1:1000 dilution. Cells were  
321 imaged with a Zeiss LSM 880 confocal, with 1 Airy unit pinhole for all channel  
322 acquisitions, and scanned with a  $0.07 \mu\text{m} \times 0.07 \mu\text{m}$  pixel size. The objective lens  
323 used was a Plan-Apochromat 63x/1,4NA (M27). Alexa Fluor 555 was excited using a  
324 514nm laser line and detected in the 547-697nm range. DAPI was excited using a  
325 405nm laser line and detected in the 410-559nm range. Post-acquisition, matched  
326 pairs of mock and infected images for each antibody were optimised to the same  
327 degree for contrast using Zeiss Zen software. Images were acquired as 12-bit \*.czi  
328 files and exported as 8-bit TIFF files. For investigations of IF of the newly reported  
329 clinical isolates, the conditions were the same, with the exception that A549-ACE2-  
330 TMPRSS2 cells were either uninfected (mock) or infected with CVR-GLA-1, CVR-  
331 GLA-2, CVR-GLA-3 or England-02 at a MOI of 0.01 for 48 hrs prior to  
332 fixation/permeabilisation. All other methods were as described above.

333

334 **Immunofluorescence of infected cells with rescued SARS-CoV-2.** To titre the  
335 rescued P0 virus stock, Vero E6 cells were seeded in 12-well plates. The following  
336 day, these cells were infected with 10-fold serially diluted inocula in 2% DMEM (at this  
337 point the cells had reached 100% confluency and were infected using 200 $\mu$ l of  
338 inoculum per well). Following incubation for 1hr, the cells were covered with overlay  
339 media composed of equal volumes of 2XMEM (Thermo Fisher Scientific)  
340 supplemented with 4% FCS and 1.2% Avicel in RO H<sub>2</sub>O. The virus propagation was  
341 allowed to continue for 48 hrs. The cells were then fixed using 8% formaldehyde for 1  
342 hr followed by immunostaining. The plates were washed twice with PBS  
343 and then permeabilized using 0.5% Triton X-100 in PBS for 5 minutes. The plates  
344 were then washed thrice with PBS. Blocking of the wells was carried out for 2 hrs  
345 using PBS supplemented with 5% FCS (5% FCS in PBS). Infected  
346 cells were probed overnight using anti-N protein (SARS-CoV-2) using the sheep-  
347 derived antibody described herein (Dundee, 3rd bleed, 0.39mg/ml), used at a  
348 1:500 dilution in 5% FCS in PBS. The plates were washed thrice with PBS. To detect  
349 the primary antibody, the cells were incubated with Alexa Fluor 488 conjugated  
350 donkey anti-sheep antibody (A11015, Thermo Fisher Scientific) diluted 1:1000 in 5%  
351 FCS in PBS for 1 hr. The plates were washed thrice with PBS and scanned using  
352 a Celigo imaging cytometer (Nexcelom) at 2  $\mu$ m resolution.

353

354 **Immunofluorescence quantification of ACE2.** Cells were seeded on glass  
355 coverslips (VWR) in 24-well plates at a confluency of 6 x 10<sup>4</sup> cells/well. The following  
356 day, cells were washed with PBS prior to fixation and a subsequent 3 washes with

357 PBS. Cells were blocked for 30 min with PBS/10% mouse serum (Abcam)/1% BSA  
358 fraction V (Sigma). The goat polyclonal anti-ACE2 antibody (R&D Systems, AF933)  
359 was used at a dilution of 1:100 in the blocking solution described above overnight at  
360 4°C. The cells were then washed three times with PBS and probed with a mouse anti-  
361 goat IgG FITC-conjugated secondary antibody (Sigma, F4891) used at 1:100 and  
362 stained with Hoechst 33342 (2  $\mu$ g/ml) at room temperature for 30 min before washing  
363 4 times with PBS. Finally, actin was stained using Alexa Fluor™ 568 Phalloidin  
364 (Invitrogen) at 1:50 in PBS for 20 minutes before washing 4 times with PBS. Coverslips  
365 were then mounted on glass microscopy slides (Thermo Scientific) with ProLong™  
366 Gold Antifade mountant (ThermoFisher Scientific).

367 Images of cell monolayers were acquired with equal gain, laser power, pinhole  
368 and scaling of 0.008  $\mu$ m pixel size in x and y using a Zeiss LSM 880 confocal  
369 microscope. The ACE2-FITC was excited at 488nm and detected in the 493-566nm  
370 range and Hoechst 33342 was excited at 405nm and detected in the 410-489nm  
371 range. Post-acquisition, images within each set were optimised to the same degree  
372 for contrast using Zen software (Carl Zeiss). Images were acquired as 12-bit \*.czi files  
373 and exported as 8-bit TIFF files. The objective lens used was a Plan-Apochromat  
374 40x/1.4NA M27 (Carl Zeiss). To quantify ACE2 levels, 12-bit images of cell  
375 monolayers were acquired with equal gain, laser power, pinhole and scaling of 0.008  
376  $\mu$ m pixel size in x and y using a Zeiss LSM 880 confocal microscope. The objective  
377 lens used was a Zeiss Plan-Apochromat 40x/1.4NA M27. The ACE2-FITC was excited  
378 at 488nm and detected in the 493-566nm range and Hoechst was excited at 405nm  
379 and detected in the 410-489nm range. To define whole cells, actin was stained with



380 phalloidin-Alexa 568 which was excited at 561nm and detected at 568-712nm. ACE2  
381 intensity values were measured using Cell Profiler (cellprofiler.org).

382

383 **Rescue of infectious SARS-CoV-2 from plasmid.** The rescue process is facile and  
384 has been independently executed multiple times in the authors' laboratories in  
385 Estonia, the UK and Australia using different protocols.

386 Rescue protocol 1: Ten micrograms ( $\mu\text{g}$ ) of full-length RG SARS-CoV-2  
387 (Wuhan-Hu-1 strain) infectious clone cDNA was transfected into BHK-21 using  
388 Lipofectamine LTX (Life Technologies) according to the manufacturer's instructions.  
389 Transfected BHK-21 cells were cultured in Opti-MEM medium supplemented with 2%  
390 FCS and incubated at 37° C with 5% CO<sub>2</sub> for 48-72 hrs or until 50% cytopathic effect  
391 (CPE) was observed by light microscopy. The supernatant was subsequently collected  
392 and transferred to Vero E6 cells, which were cultured in DMEM medium supplemented  
393 with 2% FCS. Supernatant was collected after 48-72 hrs, or until 50% CPE was  
394 observed, then centrifuged to exclude cell debris, filtered through a 0.22  $\mu\text{m}$  filter,  
395 aliquoted and stored at -80°C prior to titration.

396 Rescue protocol 2: BHK-21 cells were grown in 6-well plates in DMEM  
397 supplemented with 10% FCS. When cells reached 80% confluency the media was  
398 changed to DMEM supplemented with 2% FCS. BHK-21 cells were  
399 transfected with Lipofectamine LTX with PLUS reagent (Thermo Fisher  
400 Scientific) using the following mix: 9  $\mu\text{l}$  of Lipofectamine LTX, 3  $\mu\text{g}$  of plasmid DNA  
401 (containing virus cDNA) and 3  $\mu\text{l}$  of PLUS reagent were added to 150  $\mu\text{l}$   
402 of OptiMEM (Thermo Fisher Scientific). After mixing, the complexes were allowed to  
403 form for 20 minutes before pipetting the mixture onto the BHK-21 cells. On

404 the following day, the media on Vero E6 cells in T25 flasks was changed to 3 ml of 2%  
405 DMEM. 1 ml of media from the transfected BHK-21 cells was then added to the Vero  
406 E6 culture and 1ml of fresh 2% DMEM was added to the BHK-21 cells. On the  
407 next day, the supernatant transfer process was repeated. Inoculation using  
408 supernatant from BHK-21 cells was repeated a final time on the third day post-  
409 transfection. Virus was allowed to replicate in Vero E6 cells for a further 4 days before  
410 harvesting the P0 stock.

411

412 **Immunoprecipitation.** To prepare lysates for IP, Vero E6 cells were infected with  
413 SARS-CoV2 (England-02 2020 EPI\_ISL\_407073) at a MOI of 0.1 for 3 days or were  
414 left uninfected. At 3 days post infection, cells were trypsinised and rinsed in ice-cold  
415 PBS before being lysed in ice cold lysis buffer (50 mM Tris/HCl pH 7.5, 1 mM EGTA,  
416 1 mM EDTA, 1% (v/v) Triton X-100, 1 mM sodium ortho-vanadate, 50 mM NaF, 5 mM  
417 sodium pyrophosphate, 0.27 M sucrose, 10 mM sodium 2-glycerophosphate, 1 mM  
418 phenylmethylsulphonyl fluoride, 1 mM benzamidine) (Emmerich *et al.*, 2016). Protein  
419 concentrations were measured using the Bradford method and IPs were set up  
420 overnight at 4°C with the antibody and protein lysate in a ratio of 3 µg of antibody per  
421 mg of protein lysate. After overnight incubation at 4°C, IPs were washed thrice in the  
422 same lysis buffer as mentioned above, before being denatured with 1X LDS (Thermo  
423 Fisher Scientific, NP0008) and 1X sample reducing agent (Thermo Fisher Scientific,  
424 NP0009). The IPs were subjected to SDS-PAGE and then transferred onto Immobilon-  
425 FL PVDF membranes (Merck Millipore, IPFL00010) before being blocked for 1 hr in  
426 5% skimmed milk in 1X Tris-buffered saline containing 0.2% Tween 20 (TBST). The  
427 PVDF membranes were then incubated with their respective biotinylated primary

428 antibodies (0.5 – 1.0 mg/ml) overnight at 4°C. The biotinylation was performed using  
429 a kit (Thermo Fisher Scientific, 90407). Streptavidin Protein DyLight 680 (Thermo  
430 Fisher Scientific, 21848) or Streptavidin Protein DyLight 800 (Thermo Fisher Scientific,  
431 21851) were used instead of a secondary at a concentration of 1:5000-1:10000. The  
432 blots were scanned using the LI-COR Odyssey CLx imaging system.

433

434 **Western blotting and luciferase assay.** For validation of the antibodies generated  
435 for this resource that were raised against various coronaviral proteins, Vero E6 cells  
436 were either mock-infected or infected with SARS-CoV-2 England-02 (hCoV-  
437 19/England/02/2020, GISAID accession EPI\_ISL\_407073) at an MOI of 0.1 or 1 (as  
438 specified) for 72 hrs before being harvested (in protein sample buffer) and sonicated.  
439 For confirmation of viral protein expression from the rescued viruses, Vero E6 cells  
440 were uninfected (mock) or infected with RG-rescued SARS-CoV-2-Wuhan-Hu-1 (wt)  
441 alongside mCherry, ZsGreen and Nanoluciferase derivatives for 48 hrs before being  
442 harvested (in protein sample buffer) and sonicated. Lysed cells were processed using  
443 a Nano-Glo Luciferase Assay kit (Promega, Cat# N1130) and bioluminescence  
444 measured using a GloMax Luminometer (Promega).

445 For western blots the cell lysates were resolved using Novex 4-12% acrylamide  
446 gels (Life Technologies) before wet-transfer onto nitrocellulose membranes (Sigma  
447 Aldrich, cat# GE10600003), after which, membranes were probed with the indicated  
448 primary antibody diluted to 0.25  $\mu\text{g/ml}$  (for the coronavirus antibodies generated for  
449 this study) in SEA BLOCK (Thermo Scientific, cat# 37527), unless otherwise specified.  
450 The primary antibody was subsequently visualized by probing with a fluorescently  
451 labeled (DyLight) rabbit anti-sheep IgG secondary antibody (Rabbit anti-sheep IgG

452 (H+L) Cross-Adsorbed Secondary Antibody Dylight 800, Thermo Fisher Scientific,  
453 cat# SA5-10060) diluted 1:10000 prior to scanning with a Li-Cor Odyssey scanner.

454 To visualize the endogenous and exogenous expression of ACE2 and  
455 TMPRSS2, Vero E6 and A549 cells that were either not modified or transduced with  
456 lentiviral vectors encoding TMPRSS2 and/or ACE2 (LV-Hygro-ACE2 or LV-Neo-  
457 TMPRSS2) before being lysed and treated as above. Membranes were then probed  
458 with either anti-ACE2 (R&D Systems cat# AF933) or anti-TMPRSS2 (Proteintech  
459 cat#14437-1-AP or Abcam, cat# ab92323) primary antibodies before visualisation with  
460 fluorescently labeled (DyLight) donkey anti-goat IgG and goat anti-rabbit IgG  
461 secondary antibodies (Thermo Fisher Scientific, cat# SA5-10090 and SA5-10036)  
462 diluted 1:10000 and scanned with a Li-Cor Odyssey scanner.

463 For loading controls, actin was visualised using an anti-actin antibody (JLA20  
464 hybridoma, provided by the Developmental Studies Hybridoma Bank at the University  
465 of Iowa), in conjunction with a fluorescently labeled (DyLight) goat anti-mouse  
466 secondary antibody (Thermo Fisher Scientific, cat# SA5-10176).

467

468

469
