# Supplementary material for: A plasmid DNA-launched SARS-CoV-2 reverse genetics system and coronavirus toolkit for COVID-19 research
Source: PubMed Central journal article supplement (PMC7906417; doi:10.1371/journal.pbio.3001091), 2021-02-25
Supplement: pbio.3001091.s009.pdf [file pbio.3001091.s009.pdf]

S2 Table. Reagents and Resources

| REAGENT or RESOURCE                                                        | SOURCE                                                                        | IDENTIFIER                           |
|----------------------------------------------------------------------------|-------------------------------------------------------------------------------|--------------------------------------|
| <b>Antibodies</b>                                                          |                                                                               |                                      |
| Goat polyclonal anti-ACE2                                                  | R&D Systems                                                                   | Cat#AF933; RRID: AB_355722           |
| Rabbit polyclonal anti-TMPRSS2                                             | Proteintech                                                                   | Cat#14437-1-AP                       |
| Mouse monoclonal anti-SARS-CoV/SARS-CoV-2 Nucleocapsid (N)                 | SinoBiologicals                                                               | 40143-MM08                           |
| Rabbit monoclonal [EPR3861] to TMPRSS2                                     | Abcam                                                                         | Abcam Cat# ab92323, RRID:AB_10585592 |
| Mouse monoclonal anti-Actin                                                | Developmental Studies Hybridoma Bank, University of Iowa                      | Clone JLA20                          |
| Rabbit anti-sheep IgG (H+L) Cross Adsorbed Secondary Antibody, DyLight 800 | Thermo Fisher Scientific                                                      | Cat# SA5-10060                       |
| Goat anti-Mouse IgG (H+L) Cross-Adsorbed Secondary Antibody, DyLight 800   | Thermo Fisher Scientific                                                      | Cat# SA5-10176                       |
| Goat anti-Rabbit IgG (H+L) Cross-Adsorbed Secondary Antibody, DyLight 800  | Thermo Fisher Scientific                                                      | Cat# SA5-10036                       |
| Donkey anti-Goat IgG (H+L) Cross-Adsorbed Secondary Antibody, DyLight 680  | Thermo Fisher Scientific                                                      | Cat# SA5-10090                       |
| Streptavidin Protein DyLight 680                                           | Thermo Fisher Scientific                                                      | Cat# 21848                           |
| Streptavidin Protein DyLight 800                                           | Thermo Fisher Scientific                                                      | Cat# 21851                           |
| Rabbit anti-sheep IgG H&L Alexa Fluor 555                                  | Abcam                                                                         | Cat# ab150182                        |
| Goat anti-mouse IgG H+L Alexa Fluor 488                                    | Life Technologies                                                             | Cat#A28175                           |
| Mouse monoclonal anti-Goat/Sheep IgG-FITC                                  | Sigma                                                                         | Cat#F4891                            |
| SARS-CoV-2 orf6                                                            | This paper; <a href="https://mrcppu-covid.bio/">https://mrcppu-covid.bio/</a> | Cat# DA087                           |
| SARS-CoV-2 orf8                                                            | This paper; <a href="https://mrcppu-covid.bio/">https://mrcppu-covid.bio/</a> | Cat# DA088                           |
| SARS-CoV-2 orf9a                                                           | This paper; <a href="https://mrcppu-covid.bio/">https://mrcppu-covid.bio/</a> | Cat# DA089                           |
| SARS-CoV-2 orf10                                                           | This paper; <a href="https://mrcppu-covid.bio/">https://mrcppu-covid.bio/</a> | Cat# DA090                           |
| SARS-CoV-2 nsp10                                                           | This paper; <a href="https://mrcppu-covid.bio/">https://mrcppu-covid.bio/</a> | Cat# DA091                           |
| SARS-CoV-2 orf7b                                                           | This paper; <a href="https://mrcppu-covid.bio/">https://mrcppu-covid.bio/</a> | Cat# DA092                           |
| SARS-CoV-2 nsp7                                                            | This paper; <a href="https://mrcppu-covid.bio/">https://mrcppu-covid.bio/</a> | Cat# DA093                           |
| SARS-CoV-2 nsp9                                                            | This paper; <a href="https://mrcppu-covid.bio/">https://mrcppu-covid.bio/</a> | Cat# DA094                           |
| SARS-CoV-2 orf3b                                                           | This paper; <a href="https://mrcppu-covid.bio/">https://mrcppu-covid.bio/</a> | Cat# DA100                           |
| SARS-CoV-2 orf9b                                                           | This paper; <a href="https://mrcppu-covid.bio/">https://mrcppu-covid.bio/</a> | Cat# DA101                           |
| SARS-CoV-2 orf3a                                                           | This paper; <a href="https://mrcppu-covid.bio/">https://mrcppu-covid.bio/</a> | Cat# DA102                           |
| SARS-CoV-2 nsp1                                                            | This paper; <a href="https://mrcppu-covid.bio/">https://mrcppu-covid.bio/</a> | Cat# DA103                           |
| SARS-CoV-2 nsp2                                                            | This paper; <a href="https://mrcppu-covid.bio/">https://mrcppu-covid.bio/</a> | Cat# DA105                           |
| SARS-CoV-2 M                                                               | This paper; <a href="https://mrcppu-covid.bio/">https://mrcppu-covid.bio/</a> | Cat# DA107                           |

|                                                                                     |                                                                                  |                                     |
|-------------------------------------------------------------------------------------|----------------------------------------------------------------------------------|-------------------------------------|
| SARS-CoV-2 E                                                                        | This paper;<br><a href="https://mrcppu-covid.bio/">https://mrcppu-covid.bio/</a> | Cat# DA108                          |
| SARS-CoV-2 nsp8                                                                     | This paper;<br><a href="https://mrcppu-covid.bio/">https://mrcppu-covid.bio/</a> | Cat# DA110                          |
| SARS-CoV-2 nsp13                                                                    | This paper;<br><a href="https://mrcppu-covid.bio/">https://mrcppu-covid.bio/</a> | Cat# DA111                          |
| SARS-CoV-2 nsp14                                                                    | This paper;<br><a href="https://mrcppu-covid.bio/">https://mrcppu-covid.bio/</a> | Cat# DA112                          |
| SARS-CoV-2 nsp16                                                                    | This paper;<br><a href="https://mrcppu-covid.bio/">https://mrcppu-covid.bio/</a> | Cat# DA113                          |
| SARS-CoV-2 N                                                                        | This paper;<br><a href="https://mrcppu-covid.bio/">https://mrcppu-covid.bio/</a> | Cat# DA114                          |
| SARS-CoV-2 nsp5                                                                     | This paper;<br><a href="https://mrcppu-covid.bio/">https://mrcppu-covid.bio/</a> | Cat# DA118                          |
| SARS-CoV-2 nsp11/12                                                                 | This paper;<br><a href="https://mrcppu-covid.bio/">https://mrcppu-covid.bio/</a> | Cat# DA119                          |
| SARS-CoV-2 nsp15                                                                    | This paper;<br><a href="https://mrcppu-covid.bio/">https://mrcppu-covid.bio/</a> | Cat# DA120                          |
| SARS-CoV-2 S                                                                        | This paper;<br><a href="https://mrcppu-covid.bio/">https://mrcppu-covid.bio/</a> | Cat# DA123                          |
| SARS-CoV-2 orf7a                                                                    | This paper;<br><a href="https://mrcppu-covid.bio/">https://mrcppu-covid.bio/</a> | Cat# DA124                          |
| SARS-CoV-2 S-RBD                                                                    | This paper;<br><a href="https://mrcppu-covid.bio/">https://mrcppu-covid.bio/</a> | Cat# DA125                          |
| SARS-CoV-2 nsp3                                                                     | This paper;<br><a href="https://mrcppu-covid.bio/">https://mrcppu-covid.bio/</a> | Cat# DA126                          |
| SARS-CoV N                                                                          | This paper;<br><a href="https://mrcppu-covid.bio/">https://mrcppu-covid.bio/</a> | Cat# DA106                          |
| MERS-CoV N                                                                          | This paper;<br><a href="https://mrcppu-covid.bio/">https://mrcppu-covid.bio/</a> | Cat# DA117                          |
| 229e N                                                                              | This paper;<br><a href="https://mrcppu-covid.bio/">https://mrcppu-covid.bio/</a> | Cat# DA115                          |
| OC43 N                                                                              | This paper;<br><a href="https://mrcppu-covid.bio/">https://mrcppu-covid.bio/</a> | Cat# DA116                          |
| SARS-CoV E                                                                          | This paper;<br><a href="https://mrcppu-covid.bio/">https://mrcppu-covid.bio/</a> | Cat# DA096                          |
| MERS-CoV E                                                                          | This paper;<br><a href="https://mrcppu-covid.bio/">https://mrcppu-covid.bio/</a> | Cat# DA095                          |
| <b>Bacterial and Virus Strains</b>                                                  |                                                                                  |                                     |
| CVR-GLA-1                                                                           | This paper                                                                       | Genbank accession:<br>MT882022      |
| CVR-GLA-2                                                                           | This paper                                                                       | GenBank accession:<br>MT906650      |
| CVR-GLA-3                                                                           | This paper                                                                       | GenBank accession:<br>MT906649      |
| hCoV-19/England/02/2020 (England-02)                                                | Public Health England                                                            | GISAID accession:<br>EPI_ISL_407073 |
| TransforMax™ EPI300™ Electrocompetent E. coli                                       | Cambio                                                                           | EC300110                            |
| <b>Clinical Samples</b>                                                             |                                                                                  |                                     |
| CVR837 sputum (for isolation of CVR-GLA-1 SARS-CoV-2 virus)                         | NHS Greater Glasgow & Clyde                                                      | GISAID accession:<br>EPI_ISL_461705 |
| CVR2224 sputum (for isolation of CVR-GLA-2 SARS-CoV-2 virus)                        | NHS Greater Glasgow & Clyde                                                      | GISAID accession:<br>EPI_ISL_448167 |
| CVR3899, bronchoalveolar lavage (BAL) (for isolation of CVR-GLA-3 SARS-CoV-2 virus) | NHS Greater Glasgow & Clyde                                                      | GISAID accession:<br>EPI_ISL_490695 |
|                                                                                     |                                                                                  |                                     |
|                                                                                     |                                                                                  |                                     |

| <b>Recombinant Proteins and Chemicals</b>      |                                                                                  |                                           |
|------------------------------------------------|----------------------------------------------------------------------------------|-------------------------------------------|
| SARS-CoV-2 orf6 protein, N-term GST uncleaved  | This paper;<br><a href="https://mrcppu-covid.bio/">https://mrcppu-covid.bio/</a> | Cat# DU68490,<br>accession:<br>QHD43420.1 |
| SARS-CoV-2 orf8 protein, N-term GST uncleaved  | This paper;<br><a href="https://mrcppu-covid.bio/">https://mrcppu-covid.bio/</a> | Cat# DU68491,<br>accession:<br>QHD43422.1 |
| SARS-CoV-2 orf9a protein, N-term GST uncleaved | This paper;<br><a href="https://mrcppu-covid.bio/">https://mrcppu-covid.bio/</a> | Cat# DU68492,<br>accession:<br>MN908947.3 |
| SARS-CoV-2 orf10 protein, N-term GST uncleaved | This paper;<br><a href="https://mrcppu-covid.bio/">https://mrcppu-covid.bio/</a> | Cat# DU67614,<br>accession:<br>QHI42199.1 |
| SARS-CoV-2 nsp10 protein, N-term GST uncleaved | This paper;<br><a href="https://mrcppu-covid.bio/">https://mrcppu-covid.bio/</a> | Cat# DU68489,<br>accession:<br>QHD43415.1 |
| SARS-CoV-2 orf7b protein, N-term GST uncleaved | This paper;<br><a href="https://mrcppu-covid.bio/">https://mrcppu-covid.bio/</a> | Cat# DU67625,<br>accession:<br>QJC19833.1 |
| SARS-CoV-2 nsp7 protein, N-term GST uncleaved  | This paper;<br><a href="https://mrcppu-covid.bio/">https://mrcppu-covid.bio/</a> | Cat# DU68505,<br>accession:<br>QHD43415.1 |
| SARS-CoV-2 nsp9 protein, N-term GST uncleaved  | This paper;<br><a href="https://mrcppu-covid.bio/">https://mrcppu-covid.bio/</a> | Cat# DU68506,<br>accession:<br>QHD43415.1 |
| SARS-CoV-2 orf3b protein, N-term GST uncleaved | This paper;<br><a href="https://mrcppu-covid.bio/">https://mrcppu-covid.bio/</a> | Cat# DU68507,<br>accession:<br>QHD43419.1 |
| SARS-CoV-2 orf9b protein, N-term GST uncleaved | This paper;<br><a href="https://mrcppu-covid.bio/">https://mrcppu-covid.bio/</a> | Cat# DU68493,<br>accession:<br>MN908947.3 |
| SARS-CoV-2 orf3a protein, N-term GST uncleaved | This paper;<br><a href="https://mrcppu-covid.bio/">https://mrcppu-covid.bio/</a> | Cat# DU67698,<br>accession:<br>QHD43417.1 |
| SARS-CoV-2 nsp1 protein, N-term GST uncleaved  | This paper;<br><a href="https://mrcppu-covid.bio/">https://mrcppu-covid.bio/</a> | Cat# DU66413,<br>accession:<br>QHD43415.1 |
| SARS-CoV-2 nsp2 protein, N-term GST uncleaved  | This paper;<br><a href="https://mrcppu-covid.bio/">https://mrcppu-covid.bio/</a> | Cat# DU66414,<br>accession:<br>QHD43415.1 |
| SARS-CoV-2 M protein, N-term GST uncleaved     | This paper;<br><a href="https://mrcppu-covid.bio/">https://mrcppu-covid.bio/</a> | Cat# DU67699,<br>accession:<br>QHD43419.1 |
| SARS-CoV-2 E protein, N-term GST uncleaved     | This paper;<br><a href="https://mrcppu-covid.bio/">https://mrcppu-covid.bio/</a> | Cat# DU68523,<br>accession:<br>QHD43418.1 |
| SARS-CoV-2 nsp8 protein, N-term GST uncleaved  | This paper;<br><a href="https://mrcppu-covid.bio/">https://mrcppu-covid.bio/</a> | Cat# DU66416,<br>accession:<br>QHD43415.1 |
| SARS-CoV-2 nsp13 protein, N-term GST uncleaved | This paper;<br><a href="https://mrcppu-covid.bio/">https://mrcppu-covid.bio/</a> | Cat# DU66417,<br>accession:<br>QHD43415.1 |
| SARS-CoV-2 nsp14 protein, N-term GST uncleaved | This paper;<br><a href="https://mrcppu-covid.bio/">https://mrcppu-covid.bio/</a> | Cat# DU66418,<br>accession:<br>QHD43415.1 |
| SARS-CoV-2 nsp16 protein, N-term GST uncleaved | This paper;<br><a href="https://mrcppu-covid.bio/">https://mrcppu-covid.bio/</a> | Cat# DU66420,<br>accession:<br>QHD43415.1 |

|                                                         |                                                                                  |                                            |
|---------------------------------------------------------|----------------------------------------------------------------------------------|--------------------------------------------|
| SARS-CoV-2 N protein, N-term GST uncleaved              | This paper;<br><a href="https://mrcppu-covid.bio/">https://mrcppu-covid.bio/</a> | Cat# DU67726,<br>accession:<br>QHD43423.2  |
| SARS-CoV-2 nsp5 protein, N-term GST uncleaved           | This paper;<br><a href="https://mrcppu-covid.bio/">https://mrcppu-covid.bio/</a> | Cat# DU67779,<br>accession:<br>QHD43415.1  |
| SARS-CoV-2 nsp11/12 protein, N-term GST uncleaved       | This paper;<br><a href="https://mrcppu-covid.bio/">https://mrcppu-covid.bio/</a> | Cat# DU67736,<br>accession:<br>QHD43415.1  |
| SARS-CoV-2 nsp15 protein, N-term GST uncleaved          | This paper;<br><a href="https://mrcppu-covid.bio/">https://mrcppu-covid.bio/</a> | Cat# DU66419.<br>accession:<br>QHD43415.1  |
| SARS-CoV-2 S protein, N-term MBP uncleaved              | This paper;<br><a href="https://mrcppu-covid.bio/">https://mrcppu-covid.bio/</a> | Cat# DU67743,<br>accession:<br>QHD43416.1  |
| SARS-CoV-2 orf7a protein, N-term MBP uncleaved          | This paper;<br><a href="https://mrcppu-covid.bio/">https://mrcppu-covid.bio/</a> | Cat# DU68508,<br>accession:<br>QHD43421.1  |
| SARS-CoV-2 S-RBD protein, N-term MBP uncleaved          | This paper;<br><a href="https://mrcppu-covid.bio/">https://mrcppu-covid.bio/</a> | Cat# DU67753,<br>accession:<br>QHD43416.1  |
| SARS-CoV-2 nsp3 protein, N-term GST uncleaved           | This paper;<br><a href="https://mrcppu-covid.bio/">https://mrcppu-covid.bio/</a> | Cat# DU67768,<br>accession:<br>QHD43415.1  |
| SARS-CoV N protein, N-term GST uncleaved                | This paper;<br><a href="https://mrcppu-covid.bio/">https://mrcppu-covid.bio/</a> | Cat# DU67701,<br>accession:<br>NP_828858.1 |
| MERS-CoV N protein, N-term GST uncleaved                | This paper;<br><a href="https://mrcppu-covid.bio/">https://mrcppu-covid.bio/</a> | Cat# DU67732,<br>accession:<br>ANF29169.1  |
| 229e N protein, N-term GST uncleaved                    | This paper;<br><a href="https://mrcppu-covid.bio/">https://mrcppu-covid.bio/</a> | Cat# DU67703,<br>accession:<br>NP_073556.1 |
| OC43 N protein, N-term GST uncleaved                    | This paper;<br><a href="https://mrcppu-covid.bio/">https://mrcppu-covid.bio/</a> | Cat# DU67704,<br>accession:<br>AEN19370.1  |
| SARS-CoV E protein, N-term GST uncleaved                | This paper;<br><a href="https://mrcppu-covid.bio/">https://mrcppu-covid.bio/</a> | Cat# DU68502,<br>accession:<br>NP_828854.1 |
| MERS-CoV E protein, N-term GST uncleaved                | This paper;<br><a href="https://mrcppu-covid.bio/">https://mrcppu-covid.bio/</a> | Cat# DU68503,<br>accession:<br>AGV08472.1  |
| Nafamostat mesylate                                     | MedChemExpress                                                                   | Cat# HY-B0190A                             |
| Apilimod                                                | MedChemExpress                                                                   | Cat# HY-14644                              |
| EIDD_2801                                               | MedChemExpress                                                                   | Cat# HY-135853                             |
| Remdesivir                                              | MedChemExpress                                                                   | Cat# HY-104077                             |
| ProLong Gold Antifade Mountant with DAPI                | Thermo Fisher Scientific                                                         | Cat# P369235                               |
| <b>Commercial Assays</b>                                |                                                                                  |                                            |
| Pierce Antibody Biotinylation Kit for IP                | Thermo Fisher Scientific                                                         | Cat# 90407                                 |
| Agencourt RNA Clean AMPure XP Beads                     | Beckman Coulter                                                                  | Cat# A63987                                |
| Qubit dsDNA HS Kit                                      | Thermo Fisher Scientific                                                         | Cat# Q32854                                |
| Kapa LTP Library Preparation Kit for Illumina Platforms | Kapa Biosystems                                                                  | Cat# KK8232                                |
| Illumina Nextera DNA Flex Kit                           | Illumina                                                                         | Cat# 20018704                              |
| Illumina Nextera DNA Unique Dual Indexes Set A          | Illumina                                                                         | Cat# 20027213                              |
| Agilent 4200 TapeStation System                         | Agilent                                                                          | Cat# G2991AA                               |
| High Sensitivity D5000 Screentape                       | Agilent                                                                          | Cat# 5067-5592                             |
| High Sensitivity D5000 Reagents                         | Agilent                                                                          | Cat# 5067-5593                             |

|                                                                                                                |                              |                                   |
|----------------------------------------------------------------------------------------------------------------|------------------------------|-----------------------------------|
| NextSeq 500550 Mid Output Kit v2.5 300 cycle kit                                                               | Illumina                     | Cat# 20024905                     |
| <b>Deposited Data</b>                                                                                          |                              |                                   |
| CVR-GLA-1                                                                                                      | This paper                   | Genbank accession: MT882022       |
| CVR-GLA-2                                                                                                      | This paper                   | Genbank accession MT906650        |
| CVR-GLA-3                                                                                                      | This paper                   | Genbank accession MT906649        |
| GenBank BioProject for SARS-CoV-2 clinical isolate and reverse genetics plasmid sequencing and genome assembly | This paper                   | GenBank BioProject PRJNA658321    |
| <b>Cell Lines</b>                                                                                              |                              |                                   |
| Human: A549 cells                                                                                              | Laboratory of Benjamin Hale  |                                   |
| <i>C. aethiops</i> : Vero E6 cells                                                                             | Laboratory of Michele Bouloy |                                   |
| <i>M. auratus</i> : BHK-21 cells                                                                               | ATCC                         | CCL-10                            |
| Caco-2                                                                                                         | CVR Cytology Cell Bank       |                                   |
| Calu-3                                                                                                         | ATCC                         | HTB-55                            |
| <b>Oligonucleotides</b>                                                                                        |                              |                                   |
| AW177-BamHI-SfiI-RFP-F': 5'-CTCTCGGATCCGGCCGAGAGGGCCATGAGCGA GCTGATTAAG-3'                                     | This paper                   | N/A                               |
| AW178-EcoRI-SfiI-RFP-R': 5'-CTCTCGAATTCGGCCAGAGAGGCCTCACTTGTG CCCCAG-3'                                        | This paper                   | N/A                               |
| MT_313:' HsTMPRSS2 5' SfiI: 5'-CTCTCTGGCCGAGAGGGCCATGGCTTTGAACTC AGGGTCACCAC-3'                                | This paper                   | N/A                               |
| MT_314: ' Hs TMPRSS2 3' SfiI: 5'-TCTCTCGGCCAGAGAGGCCTTAGCCGTCTGCCC TCATTTGTCG-3'                               | This paper                   | N/A                               |
| NEBNext Multiplex Oligos for Illumina 96 Unique Dual Index Primer Pairs Set 2                                  | New England Biolabs          | Cat# E6442S                       |
| <b>Recombinant DNA</b>                                                                                         |                              |                                   |
| pCCI-4K-SARS-CoV-2-Wuhan-Hu-1                                                                                  | This paper                   | GenBank accession: MT926410       |
| pCCI-4K-SARS-CoV-2-mCherry                                                                                     | This paper                   | GenBank accession: MT926411       |
| pCCI-4K-SARS-CoV-2-NanoLuc                                                                                     | This paper                   | GenBank accession: MT926412       |
| pCCI-4K-SARS-CoV-2-ZsGreen                                                                                     | This paper                   | GenBank accession: MW289908       |
| Homo sapiens ACE2 cDNA                                                                                         | Eurofins                     | GenBank accession: NM_001371415.1 |
| Homo sapiens TMPRSS2 cDNA                                                                                      | Integrated DNA Technologies  | GenBank accession: NM_005656      |
| <b>Algorithms and Software</b>                                                                                 |                              |                                   |

|                                                                  |                                                                                                                                                                     |                                                 |
|------------------------------------------------------------------|---------------------------------------------------------------------------------------------------------------------------------------------------------------------|-------------------------------------------------|
| Graphpad Prism 8                                                 | <a href="https://www.graphpad.com/scientific-software/prism/">https://www.graphpad.com/scientific-software/prism/</a>                                               |                                                 |
| Zeiss Zen                                                        | <a href="https://www.zeiss.com/microscopy/int/products/microscope-software/zen.html">https://www.zeiss.com/microscopy/int/products/microscope-software/zen.html</a> |                                                 |
| Burrows-Wheeler Aligner v0.7.5a & v0.7.17-r1188                  | <a href="http://bio-bwa.sourceforge.net/">http://bio-bwa.sourceforge.net/</a>                                                                                       |                                                 |
| Tanoti                                                           | <a href="http://www.bioinformatics.cvr.ac.uk/tanoti.php">http://www.bioinformatics.cvr.ac.uk/tanoti.php</a>                                                         |                                                 |
| ImageJ-1.53a                                                     | <a href="https://imagej.nih.gov">https://imagej.nih.gov</a>                                                                                                         |                                                 |
| Imaris Bitplane 9.0.2                                            | <a href="https://imaris.oxinst.com/">https://imaris.oxinst.com/</a>                                                                                                 |                                                 |
| GIMP-2.10                                                        | <a href="https://www.gimp.org">https://www.gimp.org</a>                                                                                                             |                                                 |
| Biorender                                                        | biorender.com                                                                                                                                                       |                                                 |
| <b>Other Reagents</b>                                            |                                                                                                                                                                     |                                                 |
| FastDigest restriction enzymes (KfII; PaeI; MluI; Eco81I; BamHI) | Thermo Fisher Scientific                                                                                                                                            | Cat #FD2164; #FD2204; #FD0564; #FD0374; #FD0054 |
| Tryptic Soy Agar                                                 | Becton Dickinson                                                                                                                                                    | Cat# BA-256665.03                               |
| Tryptic Soy Broth                                                | Becton Dickinson                                                                                                                                                    | Cat# BA-257107.03                               |
| FastAP Thermosensitive Alkaline Phosphatase                      | Thermo Fisher Scientific                                                                                                                                            | Cat# EF0651                                     |
| Zymoclean Gel DNA Recovery Kit                                   | Zymo Research                                                                                                                                                       | Cat# D4008                                      |
| Genomic DNA Clean & Concentrator 10                              | Zymo Research                                                                                                                                                       | Cat# D4011                                      |
| Invitrogen T4 DNA ligase                                         | Thermo Fisher Scientific                                                                                                                                            | Cat# 15224025                                   |
| NucleoBond Xtra Midi EF                                          | Machery Nagel                                                                                                                                                       | Cat# 740420.50                                  |
